# Supplementary material for: A Systematic Strategy to Find Potential Therapeutic Targets for Pseudomonas aeruginosa Using Integrated Computational Models
Source: Front Mol Biosci. 2021 Sep 20;8:728129. doi: 10.3389/fmolb.2021.728129 (PMC8488468; doi:10.3389/fmolb.2021.728129)
Supplement: Supplementary file 1 [file Table2.xlsx]

## Sheet: Supplementary_2
Supplementary Table 2 - List of the 454 gastrointestinal tract organisms from the NIH Human Microbiome Project.
Organism	Project ID	Contig CDS	Scaffold CDS
[Bacteroides] pectinophilus ATCC 43243	27825	http://downloads.hmpdacc.orglocal/db/repository/ncbi/dacc_reference_genomes/20141006/27825/27825.ABVQ01000001-ABVQ01000037.cds.fsa	http://downloads.hmpdacc.orglocal/db/repository/ncbi/dacc_reference_genomes/20141006/27825/27825.DS996920-DS996928.cds.fsa
[Clostridium asparagiforme] DSM 15981	29263	http://downloads.hmpdacc.orglocal/db/repository/ncbi/dacc_reference_genomes/20141006/29263/29263.ACCJ01000001-ACCJ01000640.cds.fsa	http://downloads.hmpdacc.orglocal/db/repository/ncbi/dacc_reference_genomes/20141006/29263/29263.GG657586-GG657677.cds.fsa
[Clostridium] bolteae ATCC BAA-613	18165	http://downloads.hmpdacc.orglocal/db/repository/ncbi/dacc_reference_genomes/20141006/18165/18165.ABCC02000001-ABCC02000078.cds.fsa	http://downloads.hmpdacc.orglocal/db/repository/ncbi/dacc_reference_genomes/20141006/18165/18165.DS480659-DS480726.cds.fsa
[Clostridium] cf. saccharolyticum K10	45855		http://downloads.hmpdacc.orglocal/db/repository/ncbi/dacc_reference_genomes/20141006/45855/45855.FP929037.cds.fsa
[Clostridium] citroniae WAL-17108	46385	http://downloads.hmpdacc.orglocal/db/repository/ncbi/dacc_reference_genomes/20141006/46385/46385.ADLJ01000001-ADLJ01000083.cds.fsa	http://downloads.hmpdacc.orglocal/db/repository/ncbi/dacc_reference_genomes/20141006/46385/46385.JH376420-JH376460.cds.fsa
[Clostridium] clostridioforme 2_1_49FAA	46389	http://downloads.hmpdacc.orglocal/db/repository/ncbi/dacc_reference_genomes/20141006/46389/46389.ADLL01000001-ADLL01000148.cds.fsa	http://downloads.hmpdacc.orglocal/db/repository/ncbi/dacc_reference_genomes/20141006/46389/46389.JH376870-JH376938.cds.fsa
[Clostridium] hathewayi DSM 13479	30755	http://downloads.hmpdacc.orglocal/db/repository/ncbi/dacc_reference_genomes/20141006/30755/30755.ACIO01000001-ACIO01001294.cds.fsa	http://downloads.hmpdacc.orglocal/db/repository/ncbi/dacc_reference_genomes/20141006/30755/30755.GG667607-GG668320.cds.fsa
[Clostridium] hathewayi WAL-18680	46393	http://downloads.hmpdacc.orglocal/db/repository/ncbi/dacc_reference_genomes/20141006/46393/46393.ADLN01000001-ADLN01000142.cds.fsa	http://downloads.hmpdacc.orglocal/db/repository/ncbi/dacc_reference_genomes/20141006/46393/46393.JH379027-JH379044.cds.fsa
[Clostridium] hiranonis DSM 13275	28657	http://downloads.hmpdacc.orglocal/db/repository/ncbi/dacc_reference_genomes/20141006/28657/28657.ABWP01000001-ABWP01000101.cds.fsa	http://downloads.hmpdacc.orglocal/db/repository/ncbi/dacc_reference_genomes/20141006/28657/28657.DS995684-DS995700.cds.fsa
[Clostridium] hylemonae DSM 15053	30369	http://downloads.hmpdacc.orglocal/db/repository/ncbi/dacc_reference_genomes/20141006/30369/30369.ABYI02000001-ABYI02000167.cds.fsa	http://downloads.hmpdacc.orglocal/db/repository/ncbi/dacc_reference_genomes/20141006/30369/30369.GG657759-GG657881.cds.fsa
[Clostridium] leptum DSM 753	18923	http://downloads.hmpdacc.orglocal/db/repository/ncbi/dacc_reference_genomes/20141006/18923/18923.ABCB02000001-ABCB02000022.cds.fsa	http://downloads.hmpdacc.orglocal/db/repository/ncbi/dacc_reference_genomes/20141006/18923/18923.DS480331-DS480351.cds.fsa
[Clostridium] methylpentosum DSM 5476	30029	http://downloads.hmpdacc.orglocal/db/repository/ncbi/dacc_reference_genomes/20141006/30029/30029.ACEC01000001-ACEC01000146.cds.fsa	http://downloads.hmpdacc.orglocal/db/repository/ncbi/dacc_reference_genomes/20141006/30029/30029.EQ973338-EQ973354.cds.fsa
[Clostridium] scindens ATCC 35704	18175	http://downloads.hmpdacc.orglocal/db/repository/ncbi/dacc_reference_genomes/20141006/18175/18175.ABFY02000001-ABFY02000068.cds.fsa	http://downloads.hmpdacc.orglocal/db/repository/ncbi/dacc_reference_genomes/20141006/18175/18175.DS499678-DS499718.cds.fsa
[Clostridium] spiroforme DSM 1552	18925	http://downloads.hmpdacc.orglocal/db/repository/ncbi/dacc_reference_genomes/20141006/18925/18925.ABIK02000001-ABIK02000016.cds.fsa	http://downloads.hmpdacc.orglocal/db/repository/ncbi/dacc_reference_genomes/20141006/18925/18925.DS562843-DS562854.cds.fsa
[Clostridium] symbiosum WAL-14163	46399	http://downloads.hmpdacc.orglocal/db/repository/ncbi/dacc_reference_genomes/20141006/46399/46399.ADLQ01000001-ADLQ01000142.cds.fsa	http://downloads.hmpdacc.orglocal/db/repository/ncbi/dacc_reference_genomes/20141006/46399/46399.GL834305-GL834356.cds.fsa
[Clostridium] symbiosum WAL-14673	46401	http://downloads.hmpdacc.orglocal/db/repository/ncbi/dacc_reference_genomes/20141006/46401/46401.ADLR01000001-ADLR01000195.cds.fsa	http://downloads.hmpdacc.orglocal/db/repository/ncbi/dacc_reference_genomes/20141006/46401/46401.GL834357-GL834411.cds.fsa
[Eubacterium] cylindroides T2-87	45917		http://downloads.hmpdacc.orglocal/db/repository/ncbi/dacc_reference_genomes/20141006/45917/45917.FP929041.cds.fsa
[Eubacterium] dolichum DSM 3991	18927	http://downloads.hmpdacc.orglocal/db/repository/ncbi/dacc_reference_genomes/20141006/18927/18927.ABAW02000001-ABAW02000025.cds.fsa	http://downloads.hmpdacc.orglocal/db/repository/ncbi/dacc_reference_genomes/20141006/18927/18927.DS483460-DS483478.cds.fsa
[Eubacterium] hallii DSM 3353	18177	http://downloads.hmpdacc.orglocal/db/repository/ncbi/dacc_reference_genomes/20141006/18177/18177.ACEP01000001-ACEP01000175.cds.fsa
[Eubacterium] siraeum 70/3	39157		http://downloads.hmpdacc.orglocal/db/repository/ncbi/dacc_reference_genomes/20141006/39157/39157.FP929044.cds.fsa
[Eubacterium] siraeum DSM 15702	18921	http://downloads.hmpdacc.orglocal/db/repository/ncbi/dacc_reference_genomes/20141006/18921/18921.ABCA03000001-ABCA03000055.cds.fsa	http://downloads.hmpdacc.orglocal/db/repository/ncbi/dacc_reference_genomes/20141006/18921/18921.DS499508-DS499551.cds.fsa
[Eubacterium] siraeum V10Sc8a	45919		http://downloads.hmpdacc.orglocal/db/repository/ncbi/dacc_reference_genomes/20141006/45919/45919.FP929059.cds.fsa
Acidaminococcus sp. D21	34117	http://downloads.hmpdacc.orglocal/db/repository/ncbi/dacc_reference_genomes/20141006/34117/34117.ACGB01000001-ACGB01000079.cds.fsa
Acidaminococcus sp. HPA0509	169431	http://downloads.hmpdacc.orglocal/db/repository/ncbi/dacc_reference_genomes/20141006/169431/169431.ATBZ01000001-ATBZ01000038.cds.fsa	http://downloads.hmpdacc.orglocal/db/repository/ncbi/dacc_reference_genomes/20141006/169431/169431.KE150449.cds.fsa
Acinetobacter junii SH205	38341	http://downloads.hmpdacc.orglocal/db/repository/ncbi/dacc_reference_genomes/20141006/38341/38341.ACPM01000001-ACPM01000176.cds.fsa	http://downloads.hmpdacc.orglocal/db/repository/ncbi/dacc_reference_genomes/20141006/38341/38341.GG705011-GG705054.cds.fsa
Acinetobacter radioresistens SH164	38345	http://downloads.hmpdacc.orglocal/db/repository/ncbi/dacc_reference_genomes/20141006/38345/38345.ACPO01000001-ACPO01000052.cds.fsa	http://downloads.hmpdacc.orglocal/db/repository/ncbi/dacc_reference_genomes/20141006/38345/38345.GG705131-GG705148.cds.fsa
Actinomyces sp. HPA0247	169432	http://downloads.hmpdacc.orglocal/db/repository/ncbi/dacc_reference_genomes/20141006/169432/169432.ATCA01000001-ATCA01000014.cds.fsa	http://downloads.hmpdacc.orglocal/db/repository/ncbi/dacc_reference_genomes/20141006/169432/169432.KE150450-KE150452.cds.fsa
Alistipes indistinctus YIT 12060	46373	http://downloads.hmpdacc.orglocal/db/repository/ncbi/dacc_reference_genomes/20141006/46373/46373.ADLD01000001-ADLD01000018.cds.fsa	http://downloads.hmpdacc.orglocal/db/repository/ncbi/dacc_reference_genomes/20141006/46373/46373.JH370371-JH370376.cds.fsa
Alistipes putredinis DSM 17216	19655	http://downloads.hmpdacc.orglocal/db/repository/ncbi/dacc_reference_genomes/20141006/19655/19655.ABFK02000001-ABFK02000020.cds.fsa	http://downloads.hmpdacc.orglocal/db/repository/ncbi/dacc_reference_genomes/20141006/19655/19655.DS499570-DS499581.cds.fsa
Alistipes shahii WAL 8301	45913		http://downloads.hmpdacc.orglocal/db/repository/ncbi/dacc_reference_genomes/20141006/45913/45913.FP929032.cds.fsa
Anaerobaculum hydrogeniformans ATCC BAA-1850	33123	http://downloads.hmpdacc.orglocal/db/repository/ncbi/dacc_reference_genomes/20141006/33123/33123.ACJX02000001-ACJX02000205.cds.fsa	http://downloads.hmpdacc.orglocal/db/repository/ncbi/dacc_reference_genomes/20141006/33123/33123.GG705294-GG705406.cds.fsa
Anaerococcus hydrogenalis DSM 7454	30747	http://downloads.hmpdacc.orglocal/db/repository/ncbi/dacc_reference_genomes/20141006/30747/30747.ABXA01000001-ABXA01000052.cds.fsa
Anaerofustis stercorihominis DSM 17244	19657	http://downloads.hmpdacc.orglocal/db/repository/ncbi/dacc_reference_genomes/20141006/19657/19657.ABIL02000001-ABIL02000006.cds.fsa	http://downloads.hmpdacc.orglocal/db/repository/ncbi/dacc_reference_genomes/20141006/19657/19657.DS560015-DS560019.cds.fsa
Anaerostipes caccae DSM 14662	18213	http://downloads.hmpdacc.orglocal/db/repository/ncbi/dacc_reference_genomes/20141006/18213/18213.ABAX03000001-ABAX03000039.cds.fsa	http://downloads.hmpdacc.orglocal/db/repository/ncbi/dacc_reference_genomes/20141006/18213/18213.DS499719-DS499744.cds.fsa
Anaerostipes hadrus DSM 3319	38323	http://downloads.hmpdacc.orglocal/db/repository/ncbi/dacc_reference_genomes/20141006/38323/38323.AMEY01000001-AMEY01000102.cds.fsa	http://downloads.hmpdacc.orglocal/db/repository/ncbi/dacc_reference_genomes/20141006/38323/38323.KB290627-KB290700.cds.fsa
Anaerostipes sp. 3_2_56FAA	39999	http://downloads.hmpdacc.orglocal/db/repository/ncbi/dacc_reference_genomes/20141006/39999/39999.ACWB01000001-ACWB01000114.cds.fsa	http://downloads.hmpdacc.orglocal/db/repository/ncbi/dacc_reference_genomes/20141006/39999/39999.GL629687-GL629699.cds.fsa
Anaerotruncus colihominis DSM 17241	19659	http://downloads.hmpdacc.orglocal/db/repository/ncbi/dacc_reference_genomes/20141006/19659/19659.ABGD02000001-ABGD02000036.cds.fsa	http://downloads.hmpdacc.orglocal/db/repository/ncbi/dacc_reference_genomes/20141006/19659/19659.DS544167-DS544194.cds.fsa
Arcobacter butzleri JV22	53195	http://downloads.hmpdacc.orglocal/db/repository/ncbi/dacc_reference_genomes/20141006/53195/53195.AEPT00000000.cds.fsa
Bacillus smithii 7_3_47FAA	40007	http://downloads.hmpdacc.orglocal/db/repository/ncbi/dacc_reference_genomes/20141006/40007/40007.ACWF01000001-ACWF01000175.cds.fsa	http://downloads.hmpdacc.orglocal/db/repository/ncbi/dacc_reference_genomes/20141006/40007/40007.JH414738-JH414765.cds.fsa
Bacillus sp. 7_6_55CFAA_CT2	40005	http://downloads.hmpdacc.orglocal/db/repository/ncbi/dacc_reference_genomes/20141006/40005/40005.ACWE01000001-ACWE01000131.cds.fsa	http://downloads.hmpdacc.orglocal/db/repository/ncbi/dacc_reference_genomes/20141006/40005/40005.JH414708-JH414737.cds.fsa
Bacteroides caccae ATCC 43185	18163	http://downloads.hmpdacc.orglocal/db/repository/ncbi/dacc_reference_genomes/20141006/18163/18163.AAVM02000001-AAVM02000021.cds.fsa
Bacteroides cellulosilyticus DSM 14838	30027	http://downloads.hmpdacc.orglocal/db/repository/ncbi/dacc_reference_genomes/20141006/30027/30027.ACCH01000001-ACCH01000525.cds.fsa	http://downloads.hmpdacc.orglocal/db/repository/ncbi/dacc_reference_genomes/20141006/30027/30027.EQ973486-EQ973551.cds.fsa
Bacteroides clarus YIT 12056	48509	http://downloads.hmpdacc.orglocal/db/repository/ncbi/dacc_reference_genomes/20141006/48509/48509.AFBM01000001-AFBM01000034.cds.fsa	http://downloads.hmpdacc.orglocal/db/repository/ncbi/dacc_reference_genomes/20141006/48509/48509.GL882580-GL882601.cds.fsa
Bacteroides coprocola DSM 17136	20521	http://downloads.hmpdacc.orglocal/db/repository/ncbi/dacc_reference_genomes/20141006/20521/20521.ABIY02000001-ABIY02000135.cds.fsa	http://downloads.hmpdacc.orglocal/db/repository/ncbi/dacc_reference_genomes/20141006/20521/20521.DS981427-DS981516.cds.fsa
Bacteroides coprophilus DSM 18228 = JCM 13818	30371	http://downloads.hmpdacc.orglocal/db/repository/ncbi/dacc_reference_genomes/20141006/30371/30371.ACBW01000001-ACBW01000285.cds.fsa	http://downloads.hmpdacc.orglocal/db/repository/ncbi/dacc_reference_genomes/20141006/30371/30371.EQ973628-EQ973700.cds.fsa
Bacteroides dorei 5_1_36/D4	32451	http://downloads.hmpdacc.orglocal/db/repository/ncbi/dacc_reference_genomes/20141006/32451/32451.ACDI02000001-ACDI02000045.cds.fsa	http://downloads.hmpdacc.orglocal/db/repository/ncbi/dacc_reference_genomes/20141006/32451/32451.JH114320-JH114329.cds.fsa
Bacteroides dorei DSM 17855	27831	http://downloads.hmpdacc.orglocal/db/repository/ncbi/dacc_reference_genomes/20141006/27831/27831.ABWZ01000001-ABWZ01000121.cds.fsa	http://downloads.hmpdacc.orglocal/db/repository/ncbi/dacc_reference_genomes/20141006/27831/27831.DS995528-DS995567.cds.fsa
Bacteroides eggerthii 1_2_48FAA	40009	http://downloads.hmpdacc.orglocal/db/repository/ncbi/dacc_reference_genomes/20141006/40009/40009.ACWG01000001-ACWG01000085.cds.fsa	http://downloads.hmpdacc.orglocal/db/repository/ncbi/dacc_reference_genomes/20141006/40009/40009.GL622538-GL622578.cds.fsa
Bacteroides eggerthii DSM 20697	27827	http://downloads.hmpdacc.orglocal/db/repository/ncbi/dacc_reference_genomes/20141006/27827/27827.ABVO01000001-ABVO01000070.cds.fsa	http://downloads.hmpdacc.orglocal/db/repository/ncbi/dacc_reference_genomes/20141006/27827/27827.DS995508-DS995527.cds.fsa
Bacteroides finegoldii DSM 17565	27823	http://downloads.hmpdacc.orglocal/db/repository/ncbi/dacc_reference_genomes/20141006/27823/27823.ABXI02000001-ABXI02000138.cds.fsa	http://downloads.hmpdacc.orglocal/db/repository/ncbi/dacc_reference_genomes/20141006/27823/27823.GG688317-GG688349.cds.fsa
Bacteroides fluxus YIT 12057	48511	http://downloads.hmpdacc.orglocal/db/repository/ncbi/dacc_reference_genomes/20141006/48511/48511.AFBN01000001-AFBN01000117.cds.fsa	http://downloads.hmpdacc.orglocal/db/repository/ncbi/dacc_reference_genomes/20141006/48511/48511.GL882602-GL882698.cds.fsa
Bacteroides fragilis 3_1_12	32433	http://downloads.hmpdacc.orglocal/db/repository/ncbi/dacc_reference_genomes/20141006/32433/32433.ABZX01000001-ABZX01000104.cds.fsa	http://downloads.hmpdacc.orglocal/db/repository/ncbi/dacc_reference_genomes/20141006/32433/32433.EQ973213-EQ973245.cds.fsa
Bacteroides intestinalis DSM 17393	20523	http://downloads.hmpdacc.orglocal/db/repository/ncbi/dacc_reference_genomes/20141006/20523/20523.ABJL02000001-ABJL02000008.cds.fsa
Bacteroides oleiciplenus YIT 12058	46377	http://downloads.hmpdacc.orglocal/db/repository/ncbi/dacc_reference_genomes/20141006/46377/46377.ADLF01000001-ADLF01000032.cds.fsa	http://downloads.hmpdacc.orglocal/db/repository/ncbi/dacc_reference_genomes/20141006/46377/46377.JH992940-JH992954.cds.fsa
Bacteroides ovatus 3_8_47FAA	40011	http://downloads.hmpdacc.orglocal/db/repository/ncbi/dacc_reference_genomes/20141006/40011/40011.ACWH01000001-ACWH01000042.cds.fsa	http://downloads.hmpdacc.orglocal/db/repository/ncbi/dacc_reference_genomes/20141006/40011/40011.GL945018-GL945042.cds.fsa
Bacteroides ovatus ATCC 8483	18191	http://downloads.hmpdacc.orglocal/db/repository/ncbi/dacc_reference_genomes/20141006/18191/18191.AAXF02000001-AAXF02000054.cds.fsa	http://downloads.hmpdacc.orglocal/db/repository/ncbi/dacc_reference_genomes/20141006/18191/18191.DS264553-DS264584.cds.fsa
Bacteroides ovatus SD CMC 3f	42769	http://downloads.hmpdacc.orglocal/db/repository/ncbi/dacc_reference_genomes/20141006/42769/42769.ADMO01000001-ADMO01000156.cds.fsa
Bacteroides plebeius DSM 17135	27829	http://downloads.hmpdacc.orglocal/db/repository/ncbi/dacc_reference_genomes/20141006/27829/27829.ABQC02000001-ABQC02000025.cds.fsa	http://downloads.hmpdacc.orglocal/db/repository/ncbi/dacc_reference_genomes/20141006/27829/27829.DS990117-DS990135.cds.fsa
Bacteroides salyersiae WAL 10018 = DSM 18765 = JCM 12988	170350	http://downloads.hmpdacc.orglocal/db/repository/ncbi/dacc_reference_genomes/20141006/170350/170350.AQHX01000001-AQHX01000021.cds.fsa	http://downloads.hmpdacc.orglocal/db/repository/ncbi/dacc_reference_genomes/20141006/170350/170350.KB905466-KB905471.cds.fsa
Bacteroides sp. 1_1_14	38765	http://downloads.hmpdacc.orglocal/db/repository/ncbi/dacc_reference_genomes/20141006/38765/38765.ACRP01000001-ACRP01000189.cds.fsa	http://downloads.hmpdacc.orglocal/db/repository/ncbi/dacc_reference_genomes/20141006/38765/38765.GG774702-GG774758.cds.fsa
Bacteroides sp. 1_1_30	41955	http://downloads.hmpdacc.orglocal/db/repository/ncbi/dacc_reference_genomes/20141006/41955/41955.ADCL01000001-ADCL01000171.cds.fsa	http://downloads.hmpdacc.orglocal/db/repository/ncbi/dacc_reference_genomes/20141006/41955/41955.GL945090-GL945162.cds.fsa
Bacteroides sp. 1_1_6	32435	http://downloads.hmpdacc.orglocal/db/repository/ncbi/dacc_reference_genomes/20141006/32435/32435.ACIC02000001-ACIC02000097.cds.fsa	http://downloads.hmpdacc.orglocal/db/repository/ncbi/dacc_reference_genomes/20141006/32435/32435.JH636028-JH636042.cds.fsa
Bacteroides sp. 2_1_16	38347	http://downloads.hmpdacc.orglocal/db/repository/ncbi/dacc_reference_genomes/20141006/38347/38347.ACPP01000001-ACPP01000064.cds.fsa	http://downloads.hmpdacc.orglocal/db/repository/ncbi/dacc_reference_genomes/20141006/38347/38347.GG705209-GG705226.cds.fsa
Bacteroides sp. 2_1_22	38349	http://downloads.hmpdacc.orglocal/db/repository/ncbi/dacc_reference_genomes/20141006/38349/38349.ACPQ01000001-ACPQ01000133.cds.fsa	http://downloads.hmpdacc.orglocal/db/repository/ncbi/dacc_reference_genomes/20141006/38349/38349.GG705173-GG705208.cds.fsa
Bacteroides sp. 2_1_33B	38351	http://downloads.hmpdacc.orglocal/db/repository/ncbi/dacc_reference_genomes/20141006/38351/38351.ACPR01000001-ACPR01000068.cds.fsa	http://downloads.hmpdacc.orglocal/db/repository/ncbi/dacc_reference_genomes/20141006/38351/38351.GG705149-GG705172.cds.fsa
Bacteroides sp. 2_1_56FAA	40013	http://downloads.hmpdacc.orglocal/db/repository/ncbi/dacc_reference_genomes/20141006/40013/40013.ACWI01000001-ACWI01000096.cds.fsa	http://downloads.hmpdacc.orglocal/db/repository/ncbi/dacc_reference_genomes/20141006/40013/40013.GL945043-GL945089.cds.fsa
Bacteroides sp. 2_2_4	32439	http://downloads.hmpdacc.orglocal/db/repository/ncbi/dacc_reference_genomes/20141006/32439/32439.ABZZ01000001-ABZZ01000204.cds.fsa	http://downloads.hmpdacc.orglocal/db/repository/ncbi/dacc_reference_genomes/20141006/32439/32439.EQ973355-EQ973418.cds.fsa
Bacteroides sp. 3_1_19	41951	http://downloads.hmpdacc.orglocal/db/repository/ncbi/dacc_reference_genomes/20141006/41951/41951.ADCJ01000001-ADCJ01000085.cds.fsa	http://downloads.hmpdacc.orglocal/db/repository/ncbi/dacc_reference_genomes/20141006/41951/41951.GG774759-GG774794.cds.fsa
Bacteroides sp. 3_1_23	38771	http://downloads.hmpdacc.orglocal/db/repository/ncbi/dacc_reference_genomes/20141006/38771/38771.ACRS01000001-ACRS01000087.cds.fsa	http://downloads.hmpdacc.orglocal/db/repository/ncbi/dacc_reference_genomes/20141006/38771/38771.GG774949-GG774968.cds.fsa
Bacteroides sp. 3_1_33FAA	38353	http://downloads.hmpdacc.orglocal/db/repository/ncbi/dacc_reference_genomes/20141006/38353/38353.ACPS01000001-ACPS01000099.cds.fsa	http://downloads.hmpdacc.orglocal/db/repository/ncbi/dacc_reference_genomes/20141006/38353/38353.GG705227-GG705261.cds.fsa
Bacteroides sp. 3_1_40A	38773	http://downloads.hmpdacc.orglocal/db/repository/ncbi/dacc_reference_genomes/20141006/38773/38773.ACRT01000001-ACRT01000186.cds.fsa	http://downloads.hmpdacc.orglocal/db/repository/ncbi/dacc_reference_genomes/20141006/38773/38773.GL635653-GL635725.cds.fsa
Bacteroides sp. 3_2_5	32441	http://downloads.hmpdacc.orglocal/db/repository/ncbi/dacc_reference_genomes/20141006/32441/32441.ACIB02000001-ACIB02000017.cds.fsa	http://downloads.hmpdacc.orglocal/db/repository/ncbi/dacc_reference_genomes/20141006/32441/32441.JH636043-JH636047.cds.fsa
Bacteroides sp. 4_1_36	39357	http://downloads.hmpdacc.orglocal/db/repository/ncbi/dacc_reference_genomes/20141006/39357/39357.ACTC01000001-ACTC01000158.cds.fsa	http://downloads.hmpdacc.orglocal/db/repository/ncbi/dacc_reference_genomes/20141006/39357/39357.GL622500-GL622537.cds.fsa
Bacteroides sp. 4_3_47FAA	32443	http://downloads.hmpdacc.orglocal/db/repository/ncbi/dacc_reference_genomes/20141006/32443/32443.ACDR02000001-ACDR02000170.cds.fsa	http://downloads.hmpdacc.orglocal/db/repository/ncbi/dacc_reference_genomes/20141006/32443/32443.JH114352-JH114390.cds.fsa
Bacteroides sp. 9_1_42FAA	32445	http://downloads.hmpdacc.orglocal/db/repository/ncbi/dacc_reference_genomes/20141006/32445/32445.ACAA01000001-ACAA01000121.cds.fsa	http://downloads.hmpdacc.orglocal/db/repository/ncbi/dacc_reference_genomes/20141006/32445/32445.EQ973125-EQ973174.cds.fsa
Bacteroides sp. D1	32447	http://downloads.hmpdacc.orglocal/db/repository/ncbi/dacc_reference_genomes/20141006/32447/32447.ACAB02000001-ACAB02000120.cds.fsa	http://downloads.hmpdacc.orglocal/db/repository/ncbi/dacc_reference_genomes/20141006/32447/32447.JH114330-JH114351.cds.fsa
Bacteroides sp. D2	32449	http://downloads.hmpdacc.orglocal/db/repository/ncbi/dacc_reference_genomes/20141006/32449/32449.ACGA02000001-ACGA02000069.cds.fsa	http://downloads.hmpdacc.orglocal/db/repository/ncbi/dacc_reference_genomes/20141006/32449/32449.JH636016-JH636027.cds.fsa
Bacteroides sp. D20	38355	http://downloads.hmpdacc.orglocal/db/repository/ncbi/dacc_reference_genomes/20141006/38355/38355.ACPT01000001-ACPT01000062.cds.fsa	http://downloads.hmpdacc.orglocal/db/repository/ncbi/dacc_reference_genomes/20141006/38355/38355.GG730105-GG730119.cds.fsa
Bacteroides sp. D22	41953	http://downloads.hmpdacc.orglocal/db/repository/ncbi/dacc_reference_genomes/20141006/41953/41953.ADCK01000001-ADCK01000226.cds.fsa	http://downloads.hmpdacc.orglocal/db/repository/ncbi/dacc_reference_genomes/20141006/41953/41953.GG774795-GG774888.cds.fsa
Bacteroides sp. HPS0048	72497	http://downloads.hmpdacc.orglocal/db/repository/ncbi/dacc_reference_genomes/20141006/72497/72497.AGEU01000001-AGEU01000083.cds.fsa	http://downloads.hmpdacc.orglocal/db/repository/ncbi/dacc_reference_genomes/20141006/72497/72497.KB905487-KB905496.cds.fsa
Bacteroides stercoris ATCC 43183	19859	http://downloads.hmpdacc.orglocal/db/repository/ncbi/dacc_reference_genomes/20141006/19859/19859.ABFZ02000001-ABFZ02000023.cds.fsa	http://downloads.hmpdacc.orglocal/db/repository/ncbi/dacc_reference_genomes/20141006/19859/19859.DS499661-DS499677.cds.fsa
Bacteroides uniformis ATCC 8492	18195	http://downloads.hmpdacc.orglocal/db/repository/ncbi/dacc_reference_genomes/20141006/18195/18195.AAYH02000001-AAYH02000049.cds.fsa	http://downloads.hmpdacc.orglocal/db/repository/ncbi/dacc_reference_genomes/20141006/18195/18195.DS362217-DS362249.cds.fsa
Bacteroides vulgatus PC510	42763	http://downloads.hmpdacc.orglocal/db/repository/ncbi/dacc_reference_genomes/20141006/42763/42763.ADKO01000001-ADKO01000117.cds.fsa
Bacteroides xylanisolvens SD CC 1b	42773	http://downloads.hmpdacc.orglocal/db/repository/ncbi/dacc_reference_genomes/20141006/42773/42773.ADKP01000001-ADKP01000236.cds.fsa
Bacteroides xylanisolvens SD CC 2a	42771	http://downloads.hmpdacc.orglocal/db/repository/ncbi/dacc_reference_genomes/20141006/42771/42771.ADMP01000001-ADMP01000305.cds.fsa
Bacteroides xylanisolvens XB1A	39177		http://downloads.hmpdacc.orglocal/db/repository/ncbi/dacc_reference_genomes/20141006/39177/39177.FP929033.cds.fsa
Barnesiella intestinihominis YIT 11860	46375	http://downloads.hmpdacc.orglocal/db/repository/ncbi/dacc_reference_genomes/20141006/46375/46375.ADLE01000001-ADLE01000019.cds.fsa	http://downloads.hmpdacc.orglocal/db/repository/ncbi/dacc_reference_genomes/20141006/46375/46375.JH815203-JH815207.cds.fsa
Bifidobacterium adolescentis L2-32	18197	http://downloads.hmpdacc.orglocal/db/repository/ncbi/dacc_reference_genomes/20141006/18197/18197.AAXD02000001-AAXD02000074.cds.fsa	http://downloads.hmpdacc.orglocal/db/repository/ncbi/dacc_reference_genomes/20141006/18197/18197.DS264420-DS264459.cds.fsa
Bifidobacterium angulatum DSM 20098 = JCM 7096	29261	http://downloads.hmpdacc.orglocal/db/repository/ncbi/dacc_reference_genomes/20141006/29261/29261.ABYS02000001-ABYS02000017.cds.fsa	http://downloads.hmpdacc.orglocal/db/repository/ncbi/dacc_reference_genomes/20141006/29261/29261.GG663535-GG663540.cds.fsa
Bifidobacterium bifidum NCIMB 41171	30055	http://downloads.hmpdacc.orglocal/db/repository/ncbi/dacc_reference_genomes/20141006/30055/30055.ABQP01000001-ABQP01000033.cds.fsa	http://downloads.hmpdacc.orglocal/db/repository/ncbi/dacc_reference_genomes/20141006/30055/30055.DS990229-DS990237.cds.fsa
Bifidobacterium breve DSM 20213 = JCM 1192	29259	http://downloads.hmpdacc.orglocal/db/repository/ncbi/dacc_reference_genomes/20141006/29259/29259.ACCG02000001-ACCG02000117.cds.fsa	http://downloads.hmpdacc.orglocal/db/repository/ncbi/dacc_reference_genomes/20141006/29259/29259.GG729830-GG729932.cds.fsa
Bifidobacterium breve HPH0326	169434	http://downloads.hmpdacc.orglocal/db/repository/ncbi/dacc_reference_genomes/20141006/169434/169434.ATCB01000001-ATCB01000006.cds.fsa	http://downloads.hmpdacc.orglocal/db/repository/ncbi/dacc_reference_genomes/20141006/169434/169434.KE150453-KE150456.cds.fsa
Bifidobacterium catenulatum DSM 16992 = JCM 1194 = LMG 11043	30749	http://downloads.hmpdacc.orglocal/db/repository/ncbi/dacc_reference_genomes/20141006/30749/30749.ABXY01000001-ABXY01000031.cds.fsa
Bifidobacterium dentium ATCC 27678	20555	http://downloads.hmpdacc.orglocal/db/repository/ncbi/dacc_reference_genomes/20141006/20555/20555.ABIX02000001-ABIX02000002.cds.fsa
Bifidobacterium gallicum DSM 20093 = LMG 11596	30751	http://downloads.hmpdacc.orglocal/db/repository/ncbi/dacc_reference_genomes/20141006/30751/30751.ABXB03000001-ABXB03000027.cds.fsa
Bifidobacterium longum subsp. infantis 157F	32051		http://downloads.hmpdacc.orglocal/db/repository/ncbi/dacc_reference_genomes/20141006/32051/32051.AP010890.1-AP010892.1.cds.fsa
Bifidobacterium longum subsp. infantis ATCC 15697 = JCM 1222 = DSM	32049		http://downloads.hmpdacc.orglocal/db/repository/ncbi/dacc_reference_genomes/20141006/32049/32049.AP010889.cds.fsa
Bifidobacterium longum subsp. infantis CCUG 52486	30065	http://downloads.hmpdacc.orglocal/db/repository/ncbi/dacc_reference_genomes/20141006/30065/30065.ABQQ01000001-ABQQ01000055.cds.fsa	http://downloads.hmpdacc.orglocal/db/repository/ncbi/dacc_reference_genomes/20141006/30065/30065.DS990238-DS990259.cds.fsa
Bifidobacterium longum subsp. longum 2-2B	89651	http://downloads.hmpdacc.orglocal/db/repository/ncbi/dacc_reference_genomes/20141006/89651/89651.AJTJ01000001-AJTJ01000141.cds.fsa
Bifidobacterium longum subsp. longum 44B	89645	http://downloads.hmpdacc.orglocal/db/repository/ncbi/dacc_reference_genomes/20141006/89645/89645.AJTM01000001-AJTM01000062.cds.fsa
Bifidobacterium longum subsp. longum ATCC 55813	31437	http://downloads.hmpdacc.orglocal/db/repository/ncbi/dacc_reference_genomes/20141006/31437/31437.ACHI01000001-ACHI01000140.cds.fsa	http://downloads.hmpdacc.orglocal/db/repository/ncbi/dacc_reference_genomes/20141006/31437/31437.GG666849-GG666962.cds.fsa
Bifidobacterium longum subsp. longum F8	45963		http://downloads.hmpdacc.orglocal/db/repository/ncbi/dacc_reference_genomes/20141006/45963/45963.FP929034.cds.fsa
Bifidobacterium longum subsp. longum JCM 1217	32047		http://downloads.hmpdacc.orglocal/db/repository/ncbi/dacc_reference_genomes/20141006/32047/32047.AP010888.cds.fsa
Bifidobacterium pseudocatenulatum DSM 20438 = JCM 1200 = LMG 10505	30373	http://downloads.hmpdacc.orglocal/db/repository/ncbi/dacc_reference_genomes/20141006/30373/30373.ABXX02000001-ABXX02000036.cds.fsa
Bifidobacterium sp. 12_1_47BFAA	41959	http://downloads.hmpdacc.orglocal/db/repository/ncbi/dacc_reference_genomes/20141006/41959/41959.ADCN01000001-ADCN01000086.cds.fsa	http://downloads.hmpdacc.orglocal/db/repository/ncbi/dacc_reference_genomes/20141006/41959/41959.GL622625-GL622685.cds.fsa
Bilophila sp. 4_1_30	41961	http://downloads.hmpdacc.orglocal/db/repository/ncbi/dacc_reference_genomes/20141006/41961/41961.ADCO01000001-ADCO01000418.cds.fsa	http://downloads.hmpdacc.orglocal/db/repository/ncbi/dacc_reference_genomes/20141006/41961/41961.JH114231-JH114299.cds.fsa
Bilophila wadsworthia 3_1_6	41963	http://downloads.hmpdacc.orglocal/db/repository/ncbi/dacc_reference_genomes/20141006/41963/41963.ADCP02000001-ADCP02000005.cds.fsa	http://downloads.hmpdacc.orglocal/db/repository/ncbi/dacc_reference_genomes/20141006/41963/41963.KE150238-KE150241.cds.fsa
Blautia hansenii DSM 20583	30021	http://downloads.hmpdacc.orglocal/db/repository/ncbi/dacc_reference_genomes/20141006/30021/30021.ABYU02000001-ABYU02000063.cds.fsa	http://downloads.hmpdacc.orglocal/db/repository/ncbi/dacc_reference_genomes/20141006/30021/30021.GG698588-GG698595.cds.fsa
Blautia hydrogenotrophica DSM 10507	21007	http://downloads.hmpdacc.orglocal/db/repository/ncbi/dacc_reference_genomes/20141006/21007/21007.ACBZ01000001-ACBZ01000233.cds.fsa	http://downloads.hmpdacc.orglocal/db/repository/ncbi/dacc_reference_genomes/20141006/21007/21007.GG657678-GG657710.cds.fsa
Burkholderiales bacterium 1_1_47	41965	http://downloads.hmpdacc.orglocal/db/repository/ncbi/dacc_reference_genomes/20141006/41965/41965.ADCQ01000001-ADCQ01000096.cds.fsa	http://downloads.hmpdacc.orglocal/db/repository/ncbi/dacc_reference_genomes/20141006/41965/41965.GL383992-GL384028.cds.fsa
butyrate-producing bacterium SM4/1	45955		http://downloads.hmpdacc.orglocal/db/repository/ncbi/dacc_reference_genomes/20141006/45955/45955.FP929060.cds.fsa
butyrate-producing bacterium SS3/4	39155		http://downloads.hmpdacc.orglocal/db/repository/ncbi/dacc_reference_genomes/20141006/39155/39155.FP929062.cds.fsa
butyrate-producing bacterium SSC/2	45957		http://downloads.hmpdacc.orglocal/db/repository/ncbi/dacc_reference_genomes/20141006/45957/45957.FP929061.cds.fsa
Butyricicoccus pullicaecorum 1.2	170345	http://downloads.hmpdacc.orglocal/db/repository/ncbi/dacc_reference_genomes/20141006/170345/170345.AQOB01000001-AQOB01000017.cds.fsa	http://downloads.hmpdacc.orglocal/db/repository/ncbi/dacc_reference_genomes/20141006/170345/170345.KB976103-KB976106.cds.fsa
Butyrivibrio crossotus DSM 2876	28999	http://downloads.hmpdacc.orglocal/db/repository/ncbi/dacc_reference_genomes/20141006/28999/28999.ABWN01000001-ABWN01000051.cds.fsa	http://downloads.hmpdacc.orglocal/db/repository/ncbi/dacc_reference_genomes/20141006/28999/28999.GG663504-GG663534.cds.fsa
Butyrivibrio fibrisolvens 16/4	39147		http://downloads.hmpdacc.orglocal/db/repository/ncbi/dacc_reference_genomes/20141006/39147/39147.FP929036.cds.fsa
Campylobacter coli JV20	50513	http://downloads.hmpdacc.orglocal/db/repository/ncbi/dacc_reference_genomes/20141006/50513/50513.AEER01000001-AEER01000034.cds.fsa	http://downloads.hmpdacc.orglocal/db/repository/ncbi/dacc_reference_genomes/20141006/50513/50513.GL405235-GL405245.cds.fsa
Campylobacter sp. 10_1_50	40015	http://downloads.hmpdacc.orglocal/db/repository/ncbi/dacc_reference_genomes/20141006/40015/40015.ACWJ01000001-ACWJ01000032.cds.fsa	http://downloads.hmpdacc.orglocal/db/repository/ncbi/dacc_reference_genomes/20141006/40015/40015.JH414887-JH414899.cds.fsa
Campylobacter upsaliensis JV21	53193	http://downloads.hmpdacc.orglocal/db/repository/ncbi/dacc_reference_genomes/20141006/53193/53193.AEPU00000000.cds.fsa
Catenibacterium mitsuokai DSM 15897	19923	http://downloads.hmpdacc.orglocal/db/repository/ncbi/dacc_reference_genomes/20141006/19923/19923.ACCK01000001-ACCK01000475.cds.fsa
Cedecea davisae DSM 4568	30753	http://downloads.hmpdacc.orglocal/db/repository/ncbi/dacc_reference_genomes/20141006/30753/30753.ATDT01000001-ATDT01000045.cds.fsa	http://downloads.hmpdacc.orglocal/db/repository/ncbi/dacc_reference_genomes/20141006/30753/30753.KE161030-KE161033.cds.fsa
Citrobacter freundii 4_7_47CFAA	46379	http://downloads.hmpdacc.orglocal/db/repository/ncbi/dacc_reference_genomes/20141006/46379/46379.ADLG01000001-ADLG01000036.cds.fsa	http://downloads.hmpdacc.orglocal/db/repository/ncbi/dacc_reference_genomes/20141006/46379/46379.JH414876-JH414886.cds.fsa
Citrobacter sp. 30_2	32453	http://downloads.hmpdacc.orglocal/db/repository/ncbi/dacc_reference_genomes/20141006/32453/32453.ACDJ02000001-ACDJ02000030.cds.fsa	http://downloads.hmpdacc.orglocal/db/repository/ncbi/dacc_reference_genomes/20141006/32453/32453.KI391984-KI391992.cds.fsa
Citrobacter youngae ATCC 29220	28665	http://downloads.hmpdacc.orglocal/db/repository/ncbi/dacc_reference_genomes/20141006/28665/28665.ABWL02000001-ABWL02000049.cds.fsa	http://downloads.hmpdacc.orglocal/db/repository/ncbi/dacc_reference_genomes/20141006/28665/28665.GG730299-GG730308.cds.fsa
Clostridiales bacterium 1_7_47FAA	30067	http://downloads.hmpdacc.orglocal/db/repository/ncbi/dacc_reference_genomes/20141006/30067/30067.ABQR01000001-ABQR01000172.cds.fsa	http://downloads.hmpdacc.orglocal/db/repository/ncbi/dacc_reference_genomes/20141006/30067/30067.DS990260-DS990367.cds.fsa
Clostridium celatum DSM 1785	30375	http://downloads.hmpdacc.orglocal/db/repository/ncbi/dacc_reference_genomes/20141006/30375/30375.AMEZ01000001-AMEZ01000137.cds.fsa	http://downloads.hmpdacc.orglocal/db/repository/ncbi/dacc_reference_genomes/20141006/30375/30375.KB291596-KB291717.cds.fsa
Clostridium perfringens WAL-14572	46397	http://downloads.hmpdacc.orglocal/db/repository/ncbi/dacc_reference_genomes/20141006/46397/46397.ADLP01000001-ADLP01000035.cds.fsa	http://downloads.hmpdacc.orglocal/db/repository/ncbi/dacc_reference_genomes/20141006/46397/46397.JH594533-JH594552.cds.fsa
Clostridium sp. 7_2_43FAA	32457	http://downloads.hmpdacc.orglocal/db/repository/ncbi/dacc_reference_genomes/20141006/32457/32457.ACDK02000001-ACDK02000058.cds.fsa	http://downloads.hmpdacc.orglocal/db/repository/ncbi/dacc_reference_genomes/20141006/32457/32457.JH815220-JH815224.cds.fsa
Clostridium sp. 7_3_54FAA	40017	http://downloads.hmpdacc.orglocal/db/repository/ncbi/dacc_reference_genomes/20141006/40017/40017.ACWK01000001-ACWK01000172.cds.fsa	http://downloads.hmpdacc.orglocal/db/repository/ncbi/dacc_reference_genomes/20141006/40017/40017.JH376512-JH376562.cds.fsa
Clostridium sp. D5	32459	http://downloads.hmpdacc.orglocal/db/repository/ncbi/dacc_reference_genomes/20141006/32459/32459.ADBG01000001-ADBG01000171.cds.fsa	http://downloads.hmpdacc.orglocal/db/repository/ncbi/dacc_reference_genomes/20141006/32459/32459.GL870809-GL870855.cds.fsa
Clostridium sp. HGF2	54027	http://downloads.hmpdacc.orglocal/db/repository/ncbi/dacc_reference_genomes/20141006/54027/54027.AENW01000001-AENW01000060.cds.fsa
Clostridium sp. L2-50	18211	http://downloads.hmpdacc.orglocal/db/repository/ncbi/dacc_reference_genomes/20141006/18211/18211.AAYW02000001-AAYW02000025.cds.fsa	http://downloads.hmpdacc.orglocal/db/repository/ncbi/dacc_reference_genomes/20141006/18211/18211.DS480311-DS480330.cds.fsa
Clostridium sp. M62/1	18205	http://downloads.hmpdacc.orglocal/db/repository/ncbi/dacc_reference_genomes/20141006/18205/18205.ACFX02000001-ACFX02000085.cds.fsa	http://downloads.hmpdacc.orglocal/db/repository/ncbi/dacc_reference_genomes/20141006/18205/18205.GG730309-GG730334.cds.fsa
Clostridium sp. SS2/1	18201	http://downloads.hmpdacc.orglocal/db/repository/ncbi/dacc_reference_genomes/20141006/18201/18201.ABGC03000001-ABGC03000042.cds.fsa	http://downloads.hmpdacc.orglocal/db/repository/ncbi/dacc_reference_genomes/20141006/18201/18201.DS546996-DS547029.cds.fsa
Clostridium sporogenes ATCC 15579	20549	http://downloads.hmpdacc.orglocal/db/repository/ncbi/dacc_reference_genomes/20141006/20549/20549.ABKW02000001-ABKW02000004.cds.fsa	http://downloads.hmpdacc.orglocal/db/repository/ncbi/dacc_reference_genomes/20141006/20549/20549.DS981517-DS981518.cds.fsa
Collinsella aerofaciens ATCC 25986	18167	http://downloads.hmpdacc.orglocal/db/repository/ncbi/dacc_reference_genomes/20141006/18167/18167.AAVN02000001-AAVN02000025.cds.fsa
Collinsella intestinalis DSM 13280	29307	http://downloads.hmpdacc.orglocal/db/repository/ncbi/dacc_reference_genomes/20141006/29307/29307.ABXH02000001-ABXH02000055.cds.fsa	http://downloads.hmpdacc.orglocal/db/repository/ncbi/dacc_reference_genomes/20141006/29307/29307.GG692710-GG692712.cds.fsa
Collinsella stercoris DSM 13279	19665	http://downloads.hmpdacc.orglocal/db/repository/ncbi/dacc_reference_genomes/20141006/19665/19665.ABXJ01000001-ABXJ01000177.cds.fsa	http://downloads.hmpdacc.orglocal/db/repository/ncbi/dacc_reference_genomes/20141006/19665/19665.DS995473-DS995507.cds.fsa
Collinsella tanakaei YIT 12063	46403	http://downloads.hmpdacc.orglocal/db/repository/ncbi/dacc_reference_genomes/20141006/46403/46403.ADLS01000001-ADLS01000045.cds.fsa	http://downloads.hmpdacc.orglocal/db/repository/ncbi/dacc_reference_genomes/20141006/46403/46403.JH126467-JH126486.cds.fsa
Coprobacillus sp. 29_1	46361	http://downloads.hmpdacc.orglocal/db/repository/ncbi/dacc_reference_genomes/20141006/46361/46361.ADKX01000001-ADKX01000080.cds.fsa	http://downloads.hmpdacc.orglocal/db/repository/ncbi/dacc_reference_genomes/20141006/46361/46361.GL636577-GL636614.cds.fsa
Coprobacillus sp. 3_3_56FAA	40019	http://downloads.hmpdacc.orglocal/db/repository/ncbi/dacc_reference_genomes/20141006/40019/40019.ACWL01000001-ACWL01000106.cds.fsa	http://downloads.hmpdacc.orglocal/db/repository/ncbi/dacc_reference_genomes/20141006/40019/40019.JH470424-JH470454.cds.fsa
Coprobacillus sp. 8_2_54BFAA	39365	http://downloads.hmpdacc.orglocal/db/repository/ncbi/dacc_reference_genomes/20141006/39365/39365.ACTG01000001-ACTG01000021.cds.fsa	http://downloads.hmpdacc.orglocal/db/repository/ncbi/dacc_reference_genomes/20141006/39365/39365.JH599901-JH599909.cds.fsa
Coprobacillus sp. D6	32461	http://downloads.hmpdacc.orglocal/db/repository/ncbi/dacc_reference_genomes/20141006/32461/32461.AKCB01000001-AKCB01000009.cds.fsa
Coprobacillus sp. D7	32495	http://downloads.hmpdacc.orglocal/db/repository/ncbi/dacc_reference_genomes/20141006/32495/32495.ACDT02000001-ACDT02000168.cds.fsa	http://downloads.hmpdacc.orglocal/db/repository/ncbi/dacc_reference_genomes/20141006/32495/32495.KI391993-KI392029.cds.fsa
Coprococcus catus GD/7	45861		http://downloads.hmpdacc.orglocal/db/repository/ncbi/dacc_reference_genomes/20141006/45861/45861.FP929038.cds.fsa
Coprococcus comes ATCC 27758	20525	http://downloads.hmpdacc.orglocal/db/repository/ncbi/dacc_reference_genomes/20141006/20525/20525.ABVR01000001-ABVR01000046.cds.fsa	http://downloads.hmpdacc.orglocal/db/repository/ncbi/dacc_reference_genomes/20141006/20525/20525.GG662005-GG662017.cds.fsa
Coprococcus eutactus ATCC 27759	18187	http://downloads.hmpdacc.orglocal/db/repository/ncbi/dacc_reference_genomes/20141006/18187/18187.ABEY02000001-ABEY02000032.cds.fsa	http://downloads.hmpdacc.orglocal/db/repository/ncbi/dacc_reference_genomes/20141006/18187/18187.DS483520-DS483542.cds.fsa
Coprococcus sp. ART55/1	45915		http://downloads.hmpdacc.orglocal/db/repository/ncbi/dacc_reference_genomes/20141006/45915/45915.FP929039.cds.fsa
Coprococcus sp. HPP0048	72501	http://downloads.hmpdacc.orglocal/db/repository/ncbi/dacc_reference_genomes/20141006/72501/72501.AGEW01000001-AGEW01000011.cds.fsa	http://downloads.hmpdacc.orglocal/db/repository/ncbi/dacc_reference_genomes/20141006/72501/72501.KE150441-KE150445.cds.fsa
Coprococcus sp. HPP0074	72499	http://downloads.hmpdacc.orglocal/db/repository/ncbi/dacc_reference_genomes/20141006/72499/72499.AGEV01000001-AGEV01000014.cds.fsa	http://downloads.hmpdacc.orglocal/db/repository/ncbi/dacc_reference_genomes/20141006/72499/72499.KE150435-KE150440.cds.fsa
Corynebacterium ammoniagenes DSM 20306	38319	http://downloads.hmpdacc.orglocal/db/repository/ncbi/dacc_reference_genomes/20141006/38319/38319.ADNS01000001-ADNS01000034.cds.fsa	http://downloads.hmpdacc.orglocal/db/repository/ncbi/dacc_reference_genomes/20141006/38319/38319.GG771285-GG771310.cds.fsa
Corynebacterium sp. HFH0082	72477	http://downloads.hmpdacc.orglocal/db/repository/ncbi/dacc_reference_genomes/20141006/72477/72477.AGEM01000001-AGEM01000014.cds.fsa	http://downloads.hmpdacc.orglocal/db/repository/ncbi/dacc_reference_genomes/20141006/72477/72477.KE150404.cds.fsa
Dermabacter sp. HFH0086	169448	http://downloads.hmpdacc.orglocal/db/repository/ncbi/dacc_reference_genomes/20141006/169448/169448.ATFO01000001-ATFO01000008.cds.fsa	http://downloads.hmpdacc.orglocal/db/repository/ncbi/dacc_reference_genomes/20141006/169448/169448.KE340308.cds.fsa
Desulfitobacterium hafniense DP7	30023	http://downloads.hmpdacc.orglocal/db/repository/ncbi/dacc_reference_genomes/20141006/30023/30023.AFZX01000001-AFZX01000151.cds.fsa	http://downloads.hmpdacc.orglocal/db/repository/ncbi/dacc_reference_genomes/20141006/30023/30023.JH414432-JH414494.cds.fsa
Desulfovibrio piger ATCC 29098	18161	http://downloads.hmpdacc.orglocal/db/repository/ncbi/dacc_reference_genomes/20141006/18161/18161.ABXU01000001-ABXU01000127.cds.fsa	http://downloads.hmpdacc.orglocal/db/repository/ncbi/dacc_reference_genomes/20141006/18161/18161.DS996351-DS996397.cds.fsa
Desulfovibrio sp. 3_1_syn3	42529	http://downloads.hmpdacc.orglocal/db/repository/ncbi/dacc_reference_genomes/20141006/42529/42529.ADDR02000001-ADDR02000003.cds.fsa
Desulfovibrio sp. 6_1_46AFAA	40021	http://downloads.hmpdacc.orglocal/db/repository/ncbi/dacc_reference_genomes/20141006/40021/40021.ACWM01000001-ACWM01000097.cds.fsa	http://downloads.hmpdacc.orglocal/db/repository/ncbi/dacc_reference_genomes/20141006/40021/40021.JH114300-JH114319.cds.fsa
Dialister succinatiphilus YIT 11850	46405	http://downloads.hmpdacc.orglocal/db/repository/ncbi/dacc_reference_genomes/20141006/46405/46405.ADLT01000001-ADLT01000098.cds.fsa	http://downloads.hmpdacc.orglocal/db/repository/ncbi/dacc_reference_genomes/20141006/46405/46405.JH591187-JH591200.cds.fsa
Dorea formicigenerans 4_6_53AFAA	46407	http://downloads.hmpdacc.orglocal/db/repository/ncbi/dacc_reference_genomes/20141006/46407/46407.ADLU01000001-ADLU01000143.cds.fsa	http://downloads.hmpdacc.orglocal/db/repository/ncbi/dacc_reference_genomes/20141006/46407/46407.JH126487-JH126561.cds.fsa
Dorea formicigenerans ATCC 27755	18155	http://downloads.hmpdacc.orglocal/db/repository/ncbi/dacc_reference_genomes/20141006/18155/18155.AAXA02000001-AAXA02000016.cds.fsa
Dorea longicatena DSM 13814	18157	http://downloads.hmpdacc.orglocal/db/repository/ncbi/dacc_reference_genomes/20141006/18157/18157.AAXB02000001-AAXB02000052.cds.fsa	http://downloads.hmpdacc.orglocal/db/repository/ncbi/dacc_reference_genomes/20141006/18157/18157.DS264384-DS264419.cds.fsa
Dysgonomonas gadei ATCC BAA-286	46409	http://downloads.hmpdacc.orglocal/db/repository/ncbi/dacc_reference_genomes/20141006/46409/46409.ADLV01000001-ADLV01000065.cds.fsa	http://downloads.hmpdacc.orglocal/db/repository/ncbi/dacc_reference_genomes/20141006/46409/46409.GL891979-GL892003.cds.fsa
Dysgonomonas mossii DSM 22836	46411	http://downloads.hmpdacc.orglocal/db/repository/ncbi/dacc_reference_genomes/20141006/46411/46411.ADLW01000001-ADLW01000039.cds.fsa	http://downloads.hmpdacc.orglocal/db/repository/ncbi/dacc_reference_genomes/20141006/46411/46411.GL892004-GL892031.cds.fsa
Edwardsiella tarda ATCC 23685	28661	http://downloads.hmpdacc.orglocal/db/repository/ncbi/dacc_reference_genomes/20141006/28661/28661.ADGK01000001-ADGK01000372.cds.fsa	http://downloads.hmpdacc.orglocal/db/repository/ncbi/dacc_reference_genomes/20141006/28661/28661.GG739629-GG739715.cds.fsa
Eggerthella sp. 1_3_56FAA	40023	http://downloads.hmpdacc.orglocal/db/repository/ncbi/dacc_reference_genomes/20141006/40023/40023.ACWN01000001-ACWN01000159.cds.fsa	http://downloads.hmpdacc.orglocal/db/repository/ncbi/dacc_reference_genomes/20141006/40023/40023.GL622579-GL622606.cds.fsa
Eggerthella sp. HGA1	59527	http://downloads.hmpdacc.orglocal/db/repository/ncbi/dacc_reference_genomes/20141006/59527/59527.AEXR01000001-AEXR01000042.cds.fsa
Enterobacter cancerogenus ATCC 35316	28663	http://downloads.hmpdacc.orglocal/db/repository/ncbi/dacc_reference_genomes/20141006/28663/28663.ABWM02000001-ABWM02000062.cds.fsa	http://downloads.hmpdacc.orglocal/db/repository/ncbi/dacc_reference_genomes/20141006/28663/28663.GG704863-GG704872.cds.fsa
Enterobacter cloacae subsp. cloacae NCTC 9394	45967		http://downloads.hmpdacc.orglocal/db/repository/ncbi/dacc_reference_genomes/20141006/45967/45967.FP929040.cds.fsa
Enterobacteriaceae bacterium 9_2_54FAA	41973	http://downloads.hmpdacc.orglocal/db/repository/ncbi/dacc_reference_genomes/20141006/41973/41973.ADCU02000001-ADCU02000005.cds.fsa
Enterococcus faecalis PC1.1	42751	http://downloads.hmpdacc.orglocal/db/repository/ncbi/dacc_reference_genomes/20141006/42751/42751.ADKN01000001-ADKN01000079.cds.fsa
Enterococcus faecalis TX0104	30623	http://downloads.hmpdacc.orglocal/db/repository/ncbi/dacc_reference_genomes/20141006/30623/30623.ACGL01000001-ACGL01000237.cds.fsa	http://downloads.hmpdacc.orglocal/db/repository/ncbi/dacc_reference_genomes/20141006/30623/30623.GG668922-GG669016.cds.fsa
Enterococcus faecalis TX1302	47181	http://downloads.hmpdacc.orglocal/db/repository/ncbi/dacc_reference_genomes/20141006/47181/47181.AEBK01000001-AEBK01000066.cds.fsa	http://downloads.hmpdacc.orglocal/db/repository/ncbi/dacc_reference_genomes/20141006/47181/47181.GL454527-GL454558.cds.fsa
Enterococcus faecalis TX1322	31461	http://downloads.hmpdacc.orglocal/db/repository/ncbi/dacc_reference_genomes/20141006/31461/31461.ACGM01000001-ACGM01000116.cds.fsa	http://downloads.hmpdacc.orglocal/db/repository/ncbi/dacc_reference_genomes/20141006/31461/31461.GG669017-GG669056.cds.fsa
Enterococcus faecalis TX1341	47183	http://downloads.hmpdacc.orglocal/db/repository/ncbi/dacc_reference_genomes/20141006/47183/47183.AECF01000001-AECF01000064.cds.fsa	http://downloads.hmpdacc.orglocal/db/repository/ncbi/dacc_reference_genomes/20141006/47183/47183.GL457160-GL457197.cds.fsa
Enterococcus faecalis TX1342	47185	http://downloads.hmpdacc.orglocal/db/repository/ncbi/dacc_reference_genomes/20141006/47185/47185.AEBJ01000001-AEBJ01000045.cds.fsa	http://downloads.hmpdacc.orglocal/db/repository/ncbi/dacc_reference_genomes/20141006/47185/47185.GL454559-GL454585.cds.fsa
Enterococcus faecalis TX1346	47187	http://downloads.hmpdacc.orglocal/db/repository/ncbi/dacc_reference_genomes/20141006/47187/47187.AEBI01000001-AEBI01000115.cds.fsa	http://downloads.hmpdacc.orglocal/db/repository/ncbi/dacc_reference_genomes/20141006/47187/47187.GL454586-GL454676.cds.fsa
Enterococcus faecalis TX1467	47189	http://downloads.hmpdacc.orglocal/db/repository/ncbi/dacc_reference_genomes/20141006/47189/47189.AFBS01000001-AFBS01000220.cds.fsa	http://downloads.hmpdacc.orglocal/db/repository/ncbi/dacc_reference_genomes/20141006/47189/47189.GL883975-GL884100.cds.fsa
Enterococcus faecalis TX2134	47191	http://downloads.hmpdacc.orglocal/db/repository/ncbi/dacc_reference_genomes/20141006/47191/47191.AEBW01000001-AEBW01000098.cds.fsa	http://downloads.hmpdacc.orglocal/db/repository/ncbi/dacc_reference_genomes/20141006/47191/47191.GL455562-GL455639.cds.fsa
Enterococcus faecalis TX2137	47129	http://downloads.hmpdacc.orglocal/db/repository/ncbi/dacc_reference_genomes/20141006/47129/47129.AEBQ01000001-AEBQ01000133.cds.fsa	http://downloads.hmpdacc.orglocal/db/repository/ncbi/dacc_reference_genomes/20141006/47129/47129.GL454048-GL454153.cds.fsa
Enterococcus faecalis TX4244	47141	http://downloads.hmpdacc.orglocal/db/repository/ncbi/dacc_reference_genomes/20141006/47141/47141.AEBH01000001-AEBH01000076.cds.fsa	http://downloads.hmpdacc.orglocal/db/repository/ncbi/dacc_reference_genomes/20141006/47141/47141.GL454677-GL454729.cds.fsa
Enterococcus faecium PC4.1	42757	http://downloads.hmpdacc.orglocal/db/repository/ncbi/dacc_reference_genomes/20141006/42757/42757.ADMM01000001-ADMM01000078.cds.fsa
Enterococcus faecium TX1330	31463	http://downloads.hmpdacc.orglocal/db/repository/ncbi/dacc_reference_genomes/20141006/31463/31463.ACHL01000001-ACHL01000156.cds.fsa	http://downloads.hmpdacc.orglocal/db/repository/ncbi/dacc_reference_genomes/20141006/31463/31463.GG669057-GG669094.cds.fsa
Enterococcus saccharolyticus 30_1	46415	http://downloads.hmpdacc.orglocal/db/repository/ncbi/dacc_reference_genomes/20141006/46415/46415.ADLY01000001-ADLY01000061.cds.fsa	http://downloads.hmpdacc.orglocal/db/repository/ncbi/dacc_reference_genomes/20141006/46415/46415.JH376939-JH376954.cds.fsa
Enterococcus sp. 7L76	39181		http://downloads.hmpdacc.orglocal/db/repository/ncbi/dacc_reference_genomes/20141006/39181/39181.FP929058.cds.fsa
Erysipelatoclostridium ramosum DSM 1402	19663	http://downloads.hmpdacc.orglocal/db/repository/ncbi/dacc_reference_genomes/20141006/19663/19663.ABFX02000001-ABFX02000016.cds.fsa	http://downloads.hmpdacc.orglocal/db/repository/ncbi/dacc_reference_genomes/20141006/19663/19663.DS499649-DS499660.cds.fsa
Erysipelotrichaceae bacterium 2_2_44A	41983	http://downloads.hmpdacc.orglocal/db/repository/ncbi/dacc_reference_genomes/20141006/41983/41983.ADCZ01000001-ADCZ01000089.cds.fsa	http://downloads.hmpdacc.orglocal/db/repository/ncbi/dacc_reference_genomes/20141006/41983/41983.JH126431-JH126466.cds.fsa
Erysipelotrichaceae bacterium 21_3	39369	http://downloads.hmpdacc.orglocal/db/repository/ncbi/dacc_reference_genomes/20141006/39369/39369.ACTI01000001-ACTI01000037.cds.fsa	http://downloads.hmpdacc.orglocal/db/repository/ncbi/dacc_reference_genomes/20141006/39369/39369.JH590840-JH590845.cds.fsa
Erysipelotrichaceae bacterium 3_1_53	39371	http://downloads.hmpdacc.orglocal/db/repository/ncbi/dacc_reference_genomes/20141006/39371/39371.ACTJ01000001-ACTJ01000163.cds.fsa	http://downloads.hmpdacc.orglocal/db/repository/ncbi/dacc_reference_genomes/20141006/39371/39371.GL520132-GL520216.cds.fsa
Erysipelotrichaceae bacterium 5_2_54FAA	41103	http://downloads.hmpdacc.orglocal/db/repository/ncbi/dacc_reference_genomes/20141006/41103/41103.ACZW02000001-ACZW02000010.cds.fsa	http://downloads.hmpdacc.orglocal/db/repository/ncbi/dacc_reference_genomes/20141006/41103/41103.KI391955-KI391960.cds.fsa
Erysipelotrichaceae bacterium 6_1_45	39373	http://downloads.hmpdacc.orglocal/db/repository/ncbi/dacc_reference_genomes/20141006/39373/39373.ACTK01000001-ACTK01000091.cds.fsa	http://downloads.hmpdacc.orglocal/db/repository/ncbi/dacc_reference_genomes/20141006/39373/39373.JH590968-JH590977.cds.fsa
Escherichia coli 4_1_47FAA	39385	http://downloads.hmpdacc.orglocal/db/repository/ncbi/dacc_reference_genomes/20141006/39385/39385.ACTQ01000001-ACTQ01000109.cds.fsa	http://downloads.hmpdacc.orglocal/db/repository/ncbi/dacc_reference_genomes/20141006/39385/39385.JH594553-JH594595.cds.fsa
Escherichia coli D9	32507	http://downloads.hmpdacc.orglocal/db/repository/ncbi/dacc_reference_genomes/20141006/32507/32507.ACDL01000001-ACDL01000098.cds.fsa	http://downloads.hmpdacc.orglocal/db/repository/ncbi/dacc_reference_genomes/20141006/32507/32507.GG657384-GG657414.cds.fsa
Escherichia coli MS 107-1	40713	http://downloads.hmpdacc.orglocal/db/repository/ncbi/dacc_reference_genomes/20141006/40713/40713.ADWV01000001-ADWV01000072.cds.fsa
Escherichia coli MS 110-3	47225	http://downloads.hmpdacc.orglocal/db/repository/ncbi/dacc_reference_genomes/20141006/47225/47225.ADTW01000001-ADTW01000411.cds.fsa	http://downloads.hmpdacc.orglocal/db/repository/ncbi/dacc_reference_genomes/20141006/47225/47225.GG772980-GG773059.cds.fsa
Escherichia coli MS 115-1	47227	http://downloads.hmpdacc.orglocal/db/repository/ncbi/dacc_reference_genomes/20141006/47227/47227.ADTL01000001-ADTL01000423.cds.fsa	http://downloads.hmpdacc.orglocal/db/repository/ncbi/dacc_reference_genomes/20141006/47227/47227.GG771708-GG771868.cds.fsa
Escherichia coli MS 116-1	47229	http://downloads.hmpdacc.orglocal/db/repository/ncbi/dacc_reference_genomes/20141006/47229/47229.ADTZ01000001-ADTZ01000484.cds.fsa	http://downloads.hmpdacc.orglocal/db/repository/ncbi/dacc_reference_genomes/20141006/47229/47229.GG773342-GG773482.cds.fsa
Escherichia coli MS 117-3	47231	http://downloads.hmpdacc.orglocal/db/repository/ncbi/dacc_reference_genomes/20141006/47231/47231.ADTS01000001-ADTS01000467.cds.fsa	http://downloads.hmpdacc.orglocal/db/repository/ncbi/dacc_reference_genomes/20141006/47231/47231.GG772790-GG772979.cds.fsa
Escherichia coli MS 119-7	40709	http://downloads.hmpdacc.orglocal/db/repository/ncbi/dacc_reference_genomes/20141006/40709/40709.ADWU01000001-ADWU01000130.cds.fsa
Escherichia coli MS 124-1	40707	http://downloads.hmpdacc.orglocal/db/repository/ncbi/dacc_reference_genomes/20141006/40707/40707.ADWT01000001-ADWT01000176.cds.fsa
Escherichia coli MS 145-7	40703	http://downloads.hmpdacc.orglocal/db/repository/ncbi/dacc_reference_genomes/20141006/40703/40703.ADWS01000001-ADWS01000143.cds.fsa
Escherichia coli MS 146-1	47241	http://downloads.hmpdacc.orglocal/db/repository/ncbi/dacc_reference_genomes/20141006/47241/47241.ADTN01000001-ADTN01000355.cds.fsa	http://downloads.hmpdacc.orglocal/db/repository/ncbi/dacc_reference_genomes/20141006/47241/47241.GG772040-GG772174.cds.fsa
Escherichia coli MS 153-1	47257	http://downloads.hmpdacc.orglocal/db/repository/ncbi/dacc_reference_genomes/20141006/47257/47257.ADTX01000001-ADTX01000507.cds.fsa	http://downloads.hmpdacc.orglocal/db/repository/ncbi/dacc_reference_genomes/20141006/47257/47257.GG773060-GG773214.cds.fsa
Escherichia coli MS 16-3	47259	http://downloads.hmpdacc.orglocal/db/repository/ncbi/dacc_reference_genomes/20141006/47259/47259.ADUA01000001-ADUA01000451.cds.fsa	http://downloads.hmpdacc.orglocal/db/repository/ncbi/dacc_reference_genomes/20141006/47259/47259.GG773483-GG773587.cds.fsa
Escherichia coli MS 175-1	47263	http://downloads.hmpdacc.orglocal/db/repository/ncbi/dacc_reference_genomes/20141006/47263/47263.ADUB01000001-ADUB01000413.cds.fsa	http://downloads.hmpdacc.orglocal/db/repository/ncbi/dacc_reference_genomes/20141006/47263/47263.GG773588-GG773726.cds.fsa
Escherichia coli MS 182-1	47265	http://downloads.hmpdacc.orglocal/db/repository/ncbi/dacc_reference_genomes/20141006/47265/47265.ADTM01000001-ADTM01000456.cds.fsa	http://downloads.hmpdacc.orglocal/db/repository/ncbi/dacc_reference_genomes/20141006/47265/47265.GG771869-GG772039.cds.fsa
Escherichia coli MS 185-1	47267	http://downloads.hmpdacc.orglocal/db/repository/ncbi/dacc_reference_genomes/20141006/47267/47267.ADUE01000001-ADUE01000378.cds.fsa	http://downloads.hmpdacc.orglocal/db/repository/ncbi/dacc_reference_genomes/20141006/47267/47267.GG774191-GG774276.cds.fsa
Escherichia coli MS 187-1	47269	http://downloads.hmpdacc.orglocal/db/repository/ncbi/dacc_reference_genomes/20141006/47269/47269.ADTQ01000001-ADTQ01000310.cds.fsa	http://downloads.hmpdacc.orglocal/db/repository/ncbi/dacc_reference_genomes/20141006/47269/47269.GG772477-GG772583.cds.fsa
Escherichia coli MS 196-1	47271	http://downloads.hmpdacc.orglocal/db/repository/ncbi/dacc_reference_genomes/20141006/47271/47271.ADUD01000001-ADUD01000785.cds.fsa	http://downloads.hmpdacc.orglocal/db/repository/ncbi/dacc_reference_genomes/20141006/47271/47271.GG773880-GG774190.cds.fsa
Escherichia coli MS 198-1	47273	http://downloads.hmpdacc.orglocal/db/repository/ncbi/dacc_reference_genomes/20141006/47273/47273.ADTJ01000001-ADTJ01000564.cds.fsa	http://downloads.hmpdacc.orglocal/db/repository/ncbi/dacc_reference_genomes/20141006/47273/47273.GG771311-GG771525.cds.fsa
Escherichia coli MS 200-1	47275	http://downloads.hmpdacc.orglocal/db/repository/ncbi/dacc_reference_genomes/20141006/47275/47275.ADUC01000001-ADUC01000445.cds.fsa	http://downloads.hmpdacc.orglocal/db/repository/ncbi/dacc_reference_genomes/20141006/47275/47275.GG773727-GG773879.cds.fsa
Escherichia coli MS 21-1	47205	http://downloads.hmpdacc.orglocal/db/repository/ncbi/dacc_reference_genomes/20141006/47205/47205.ADTR01000001-ADTR01000540.cds.fsa	http://downloads.hmpdacc.orglocal/db/repository/ncbi/dacc_reference_genomes/20141006/47205/47205.GG772584-GG772789.cds.fsa
Escherichia coli MS 45-1	47207	http://downloads.hmpdacc.orglocal/db/repository/ncbi/dacc_reference_genomes/20141006/47207/47207.ADTO01000001-ADTO01000396.cds.fsa	http://downloads.hmpdacc.orglocal/db/repository/ncbi/dacc_reference_genomes/20141006/47207/47207.GG772175-GG772326.cds.fsa
Escherichia coli MS 57-2	47209	http://downloads.hmpdacc.orglocal/db/repository/ncbi/dacc_reference_genomes/20141006/47209/47209.ADUG01000001-ADUG01000408.cds.fsa	http://downloads.hmpdacc.orglocal/db/repository/ncbi/dacc_reference_genomes/20141006/47209/47209.GG774413-GG774479.cds.fsa
Escherichia coli MS 60-1	47211	http://downloads.hmpdacc.orglocal/db/repository/ncbi/dacc_reference_genomes/20141006/47211/47211.ADUF01000001-ADUF01000464.cds.fsa	http://downloads.hmpdacc.orglocal/db/repository/ncbi/dacc_reference_genomes/20141006/47211/47211.GG774277-GG774412.cds.fsa
Escherichia coli MS 69-1	47213	http://downloads.hmpdacc.orglocal/db/repository/ncbi/dacc_reference_genomes/20141006/47213/47213.ADTP01000001-ADTP01000425.cds.fsa	http://downloads.hmpdacc.orglocal/db/repository/ncbi/dacc_reference_genomes/20141006/47213/47213.GG772327-GG772476.cds.fsa
Escherichia coli MS 78-1	47217	http://downloads.hmpdacc.orglocal/db/repository/ncbi/dacc_reference_genomes/20141006/47217/47217.ADTY01000001-ADTY01000410.cds.fsa	http://downloads.hmpdacc.orglocal/db/repository/ncbi/dacc_reference_genomes/20141006/47217/47217.GG773215-GG773341.cds.fsa
Escherichia coli MS 79-10	40701	http://downloads.hmpdacc.orglocal/db/repository/ncbi/dacc_reference_genomes/20141006/40701/40701.ADWR01000001-ADWR01000157.cds.fsa
Escherichia coli MS 84-1	47219	http://downloads.hmpdacc.orglocal/db/repository/ncbi/dacc_reference_genomes/20141006/47219/47219.ADTK01000001-ADTK01000432.cds.fsa	http://downloads.hmpdacc.orglocal/db/repository/ncbi/dacc_reference_genomes/20141006/47219/47219.GG771526-GG771707.cds.fsa
Escherichia coli MS 85-1	40699	http://downloads.hmpdacc.orglocal/db/repository/ncbi/dacc_reference_genomes/20141006/40699/40699.ADWQ01000001-ADWQ01000234.cds.fsa
Escherichia coli SE11	18057		http://downloads.hmpdacc.orglocal/db/repository/ncbi/dacc_reference_genomes/20141006/18057/18057.AP009240.1-AP009246.1.cds.fsa
Escherichia coli SE15	19053		http://downloads.hmpdacc.orglocal/db/repository/ncbi/dacc_reference_genomes/20141006/19053/19053.AP009378.1-AP009379.1.cds.fsa
Escherichia sp. 1_1_43	32463	http://downloads.hmpdacc.orglocal/db/repository/ncbi/dacc_reference_genomes/20141006/32463/32463.ACID02000001-ACID02000174.cds.fsa	http://downloads.hmpdacc.orglocal/db/repository/ncbi/dacc_reference_genomes/20141006/32463/32463.JH815253-JH815299.cds.fsa
Escherichia sp. 3_2_53FAA	32465	http://downloads.hmpdacc.orglocal/db/repository/ncbi/dacc_reference_genomes/20141006/32465/32465.ACAC01000001-ACAC01000173.cds.fsa	http://downloads.hmpdacc.orglocal/db/repository/ncbi/dacc_reference_genomes/20141006/32465/32465.DS999459-DS999514.cds.fsa
Escherichia sp. 4_1_40B	32467	http://downloads.hmpdacc.orglocal/db/repository/ncbi/dacc_reference_genomes/20141006/32467/32467.ACDM02000001-ACDM02000065.cds.fsa	http://downloads.hmpdacc.orglocal/db/repository/ncbi/dacc_reference_genomes/20141006/32467/32467.JH660539-JH660546.cds.fsa
Eubacterium biforme DSM 3989	29269	http://downloads.hmpdacc.orglocal/db/repository/ncbi/dacc_reference_genomes/20141006/29269/29269.ABYT01000001-ABYT01000161.cds.fsa	http://downloads.hmpdacc.orglocal/db/repository/ncbi/dacc_reference_genomes/20141006/29269/29269.DS996836-DS996879.cds.fsa
Eubacterium rectale DSM 17629	39159		http://downloads.hmpdacc.orglocal/db/repository/ncbi/dacc_reference_genomes/20141006/39159/39159.FP929042.cds.fsa
Eubacterium rectale M104/1	39161		http://downloads.hmpdacc.orglocal/db/repository/ncbi/dacc_reference_genomes/20141006/39161/39161.FP929043.cds.fsa
Eubacterium sp. 3_1_31	39375	http://downloads.hmpdacc.orglocal/db/repository/ncbi/dacc_reference_genomes/20141006/39375/39375.ACTL01000001-ACTL01000045.cds.fsa	http://downloads.hmpdacc.orglocal/db/repository/ncbi/dacc_reference_genomes/20141006/39375/39375.JH594448-JH594450.cds.fsa
Eubacterium ventriosum ATCC 27560	18159	http://downloads.hmpdacc.orglocal/db/repository/ncbi/dacc_reference_genomes/20141006/18159/18159.AAVL02000001-AAVL02000038.cds.fsa	http://downloads.hmpdacc.orglocal/db/repository/ncbi/dacc_reference_genomes/20141006/18159/18159.DS264262-DS264288.cds.fsa
Faecalibacterium cf. prausnitzii KLE1255	46809	http://downloads.hmpdacc.orglocal/db/repository/ncbi/dacc_reference_genomes/20141006/46809/46809.AECU01000001-AECU01000249.cds.fsa	http://downloads.hmpdacc.orglocal/db/repository/ncbi/dacc_reference_genomes/20141006/46809/46809.GL538213-GL538351.cds.fsa
Faecalibacterium prausnitzii A2-165	18199	http://downloads.hmpdacc.orglocal/db/repository/ncbi/dacc_reference_genomes/20141006/18199/18199.ACOP02000001-ACOP02000115.cds.fsa	http://downloads.hmpdacc.orglocal/db/repository/ncbi/dacc_reference_genomes/20141006/18199/18199.GG697149-GG697168.cds.fsa
Faecalibacterium prausnitzii L2-6	45961		http://downloads.hmpdacc.orglocal/db/repository/ncbi/dacc_reference_genomes/20141006/45961/45961.FP929045.cds.fsa
Faecalibacterium prausnitzii M21/2	18203	http://downloads.hmpdacc.orglocal/db/repository/ncbi/dacc_reference_genomes/20141006/18203/18203.ABED02000001-ABED02000029.cds.fsa	http://downloads.hmpdacc.orglocal/db/repository/ncbi/dacc_reference_genomes/20141006/18203/18203.DS483479-DS483503.cds.fsa
Faecalibacterium prausnitzii SL3/3	39151		http://downloads.hmpdacc.orglocal/db/repository/ncbi/dacc_reference_genomes/20141006/39151/39151.FP929046.cds.fsa
Finegoldia magna ATCC 29328	18981		http://downloads.hmpdacc.orglocal/db/repository/ncbi/dacc_reference_genomes/20141006/18981/18981.AP008971.1-AP008972.1.cds.fsa
Flavonifractor plautii ATCC 29863	18189	http://downloads.hmpdacc.orglocal/db/repository/ncbi/dacc_reference_genomes/20141006/18189/18189.AGCK01000001-AGCK01000344.cds.fsa	http://downloads.hmpdacc.orglocal/db/repository/ncbi/dacc_reference_genomes/20141006/18189/18189.JH417617-JH417858.cds.fsa
Fusobacterium gonidiaformans 3-1-5R	32477	http://downloads.hmpdacc.orglocal/db/repository/ncbi/dacc_reference_genomes/20141006/32477/32477.ACDD01000001-ACDD01000099.cds.fsa	http://downloads.hmpdacc.orglocal/db/repository/ncbi/dacc_reference_genomes/20141006/32477/32477.GG657971-GG657998.cds.fsa
Fusobacterium gonidiaformans ATCC 25563	32419	http://downloads.hmpdacc.orglocal/db/repository/ncbi/dacc_reference_genomes/20141006/32419/32419.ACET01000001-ACET01000055.cds.fsa	http://downloads.hmpdacc.orglocal/db/repository/ncbi/dacc_reference_genomes/20141006/32419/32419.GG658179-GG658198.cds.fsa
Fusobacterium mortiferum ATCC 9817	32421	http://downloads.hmpdacc.orglocal/db/repository/ncbi/dacc_reference_genomes/20141006/32421/32421.ACDB02000001-ACDB02000044.cds.fsa	http://downloads.hmpdacc.orglocal/db/repository/ncbi/dacc_reference_genomes/20141006/32421/32421.GL987987-GL987994.cds.fsa
Fusobacterium necrophorum D12	32485	http://downloads.hmpdacc.orglocal/db/repository/ncbi/dacc_reference_genomes/20141006/32485/32485.ACDG02000001-ACDG02000118.cds.fsa	http://downloads.hmpdacc.orglocal/db/repository/ncbi/dacc_reference_genomes/20141006/32485/32485.GL988012-GL988028.cds.fsa
Fusobacterium necrophorum subsp. funduliforme 1_1_36S	46417	http://downloads.hmpdacc.orglocal/db/repository/ncbi/dacc_reference_genomes/20141006/46417/46417.ADLZ01000001-ADLZ01000040.cds.fsa	http://downloads.hmpdacc.orglocal/db/repository/ncbi/dacc_reference_genomes/20141006/46417/46417.JH590846-JH590860.cds.fsa
Fusobacterium nucleatum subsp. animalis 11_3_2	39559	http://downloads.hmpdacc.orglocal/db/repository/ncbi/dacc_reference_genomes/20141006/39559/39559.ACUO01000001-ACUO01000081.cds.fsa	http://downloads.hmpdacc.orglocal/db/repository/ncbi/dacc_reference_genomes/20141006/39559/39559.GL945391-GL945427.cds.fsa
Fusobacterium nucleatum subsp. animalis 21_1A	32475	http://downloads.hmpdacc.orglocal/db/repository/ncbi/dacc_reference_genomes/20141006/32475/32475.ADEE02000001-ADEE02000002.cds.fsa	http://downloads.hmpdacc.orglocal/db/repository/ncbi/dacc_reference_genomes/20141006/32475/32475.CM002368.cds.fsa
Fusobacterium nucleatum subsp. animalis 3_1_33	38519	http://downloads.hmpdacc.orglocal/db/repository/ncbi/dacc_reference_genomes/20141006/38519/38519.ACQE02000001-ACQE02000018.cds.fsa	http://downloads.hmpdacc.orglocal/db/repository/ncbi/dacc_reference_genomes/20141006/38519/38519.KI391961-KI391965.cds.fsa
Fusobacterium nucleatum subsp. animalis 7_1	32483	http://downloads.hmpdacc.orglocal/db/repository/ncbi/dacc_reference_genomes/20141006/32483/32483.ACDF01000001-ACDF01000095.cds.fsa	http://downloads.hmpdacc.orglocal/db/repository/ncbi/dacc_reference_genomes/20141006/32483/32483.GG658011-GG658028.cds.fsa
Fusobacterium nucleatum subsp. animalis ATCC 51191	64727	http://downloads.hmpdacc.orglocal/db/repository/ncbi/dacc_reference_genomes/20141006/64727/64727.AFQD01000001-AFQD01000763.cds.fsa	http://downloads.hmpdacc.orglocal/db/repository/ncbi/dacc_reference_genomes/20141006/64727/64727.GL985141-GL985605.cds.fsa
Fusobacterium nucleatum subsp. animalis D11	32501	http://downloads.hmpdacc.orglocal/db/repository/ncbi/dacc_reference_genomes/20141006/32501/32501.ACDS01000001-ACDS01000355.cds.fsa	http://downloads.hmpdacc.orglocal/db/repository/ncbi/dacc_reference_genomes/20141006/32501/32501.EQ999802-EQ999877.cds.fsa
Fusobacterium nucleatum subsp. vincentii 4_1_13	32479	http://downloads.hmpdacc.orglocal/db/repository/ncbi/dacc_reference_genomes/20141006/32479/32479.ACDE01000001-ACDE01000050.cds.fsa	http://downloads.hmpdacc.orglocal/db/repository/ncbi/dacc_reference_genomes/20141006/32479/32479.GG657999-GG658010.cds.fsa
Fusobacterium periodonticum 1_1_41FAA	32469	http://downloads.hmpdacc.orglocal/db/repository/ncbi/dacc_reference_genomes/20141006/32469/32469.ADGG01000001-ADGG01000080.cds.fsa	http://downloads.hmpdacc.orglocal/db/repository/ncbi/dacc_reference_genomes/20141006/32469/32469.GG770374-GG770404.cds.fsa
Fusobacterium periodonticum 2_1_31	32473	http://downloads.hmpdacc.orglocal/db/repository/ncbi/dacc_reference_genomes/20141006/32473/32473.ACDC03000001-ACDC03000061.cds.fsa	http://downloads.hmpdacc.orglocal/db/repository/ncbi/dacc_reference_genomes/20141006/32473/32473.KN173677-KN173682.cds.fsa
Fusobacterium ulcerans 12-1B	32471	http://downloads.hmpdacc.orglocal/db/repository/ncbi/dacc_reference_genomes/20141006/32471/32471.AGWJ02000001-AGWJ02000038.cds.fsa	http://downloads.hmpdacc.orglocal/db/repository/ncbi/dacc_reference_genomes/20141006/32471/32471.KE161007-KE161014.cds.fsa
Fusobacterium ulcerans ATCC 49185	32487	http://downloads.hmpdacc.orglocal/db/repository/ncbi/dacc_reference_genomes/20141006/32487/32487.ACDH02000001-ACDH02000049.cds.fsa	http://downloads.hmpdacc.orglocal/db/repository/ncbi/dacc_reference_genomes/20141006/32487/32487.JH815228-JH815235.cds.fsa
Fusobacterium varium ATCC 27725	32423	http://downloads.hmpdacc.orglocal/db/repository/ncbi/dacc_reference_genomes/20141006/32423/32423.ACIE02000001-ACIE02000039.cds.fsa	http://downloads.hmpdacc.orglocal/db/repository/ncbi/dacc_reference_genomes/20141006/32423/32423.GL987995-GL988005.cds.fsa
Gordonibacter pamelaeae 7-10-1-b	39175		http://downloads.hmpdacc.orglocal/db/repository/ncbi/dacc_reference_genomes/20141006/39175/39175.FP929047.cds.fsa
Hafnia alvei ATCC 51873	65123	http://downloads.hmpdacc.orglocal/db/repository/ncbi/dacc_reference_genomes/20141006/65123/65123.AGCI01000001-AGCI01000118.cds.fsa	http://downloads.hmpdacc.orglocal/db/repository/ncbi/dacc_reference_genomes/20141006/65123/65123.JH417481-JH417559.cds.fsa
Helicobacter bilis ATCC 43879	32489	http://downloads.hmpdacc.orglocal/db/repository/ncbi/dacc_reference_genomes/20141006/32489/32489.ACDN02000001-ACDN02000077.cds.fsa	http://downloads.hmpdacc.orglocal/db/repository/ncbi/dacc_reference_genomes/20141006/32489/32489.KI392032-KI392040.cds.fsa
Helicobacter canadensis MIT 98-5491	30071	http://downloads.hmpdacc.orglocal/db/repository/ncbi/dacc_reference_genomes/20141006/30071/30071.ABQS01000001-ABQS01000126.cds.fsa	http://downloads.hmpdacc.orglocal/db/repository/ncbi/dacc_reference_genomes/20141006/30071/30071.DS990368-DS990390.cds.fsa
Helicobacter cinaedi CCUG 18818	30073	http://downloads.hmpdacc.orglocal/db/repository/ncbi/dacc_reference_genomes/20141006/30073/30073.ABQT01000001-ABQT01000096.cds.fsa	http://downloads.hmpdacc.orglocal/db/repository/ncbi/dacc_reference_genomes/20141006/30073/30073.DS990391-DS990440.cds.fsa
Helicobacter pullorum MIT 98-5489	30075	http://downloads.hmpdacc.orglocal/db/repository/ncbi/dacc_reference_genomes/20141006/30075/30075.ABQU01000001-ABQU01000131.cds.fsa	http://downloads.hmpdacc.orglocal/db/repository/ncbi/dacc_reference_genomes/20141006/30075/30075.DS990441-DS990484.cds.fsa
Helicobacter pylori 35A	34603		http://downloads.hmpdacc.orglocal/db/repository/ncbi/dacc_reference_genomes/20141006/34603/34603.CP002096.cds.fsa
Helicobacter pylori 83	34609		http://downloads.hmpdacc.orglocal/db/repository/ncbi/dacc_reference_genomes/20141006/34609/34609.CP002605.cds.fsa
Helicobacter pylori GAM100Ai	89209	http://downloads.hmpdacc.orglocal/db/repository/ncbi/dacc_reference_genomes/20141006/89209/89209.ANFP01000001-ANFP01000080.cds.fsa	http://downloads.hmpdacc.orglocal/db/repository/ncbi/dacc_reference_genomes/20141006/89209/89209.JH976555-JH976601.cds.fsa
Helicobacter pylori GAM101Biv	89211	http://downloads.hmpdacc.orglocal/db/repository/ncbi/dacc_reference_genomes/20141006/89211/89211.APCW01000001-APCW01000078.cds.fsa	http://downloads.hmpdacc.orglocal/db/repository/ncbi/dacc_reference_genomes/20141006/89211/89211.KB636776-KB636828.cds.fsa
Helicobacter pylori GAM103Bi	89213	http://downloads.hmpdacc.orglocal/db/repository/ncbi/dacc_reference_genomes/20141006/89213/89213.APCX01000001-APCX01000071.cds.fsa	http://downloads.hmpdacc.orglocal/db/repository/ncbi/dacc_reference_genomes/20141006/89213/89213.KB636884-KB636928.cds.fsa
Helicobacter pylori GAM105Ai	89215	http://downloads.hmpdacc.orglocal/db/repository/ncbi/dacc_reference_genomes/20141006/89215/89215.APCY01000001-APCY01000082.cds.fsa	http://downloads.hmpdacc.orglocal/db/repository/ncbi/dacc_reference_genomes/20141006/89215/89215.KB636986-KB637032.cds.fsa
Helicobacter pylori GAM112Ai	89217	http://downloads.hmpdacc.orglocal/db/repository/ncbi/dacc_reference_genomes/20141006/89217/89217.APCZ01000001-APCZ01000136.cds.fsa	http://downloads.hmpdacc.orglocal/db/repository/ncbi/dacc_reference_genomes/20141006/89217/89217.KB641819-KB641869.cds.fsa
Helicobacter pylori GAM114Ai	89219	http://downloads.hmpdacc.orglocal/db/repository/ncbi/dacc_reference_genomes/20141006/89219/89219.APDA01000001-APDA01000064.cds.fsa	http://downloads.hmpdacc.orglocal/db/repository/ncbi/dacc_reference_genomes/20141006/89219/89219.KB642383-KB642413.cds.fsa
Helicobacter pylori GAM115Ai	89221	http://downloads.hmpdacc.orglocal/db/repository/ncbi/dacc_reference_genomes/20141006/89221/89221.APDB01000001-APDB01000090.cds.fsa	http://downloads.hmpdacc.orglocal/db/repository/ncbi/dacc_reference_genomes/20141006/89221/89221.KB644350-KB644407.cds.fsa
Helicobacter pylori GAM118Bi	89225	http://downloads.hmpdacc.orglocal/db/repository/ncbi/dacc_reference_genomes/20141006/89225/89225.APDD01000001-APDD01000095.cds.fsa	http://downloads.hmpdacc.orglocal/db/repository/ncbi/dacc_reference_genomes/20141006/89225/89225.KB644469-KB644528.cds.fsa
Helicobacter pylori GAM119Bi	89227	http://downloads.hmpdacc.orglocal/db/repository/ncbi/dacc_reference_genomes/20141006/89227/89227.APDE01000001-APDE01000078.cds.fsa	http://downloads.hmpdacc.orglocal/db/repository/ncbi/dacc_reference_genomes/20141006/89227/89227.KB644529-KB644575.cds.fsa
Helicobacter pylori GAM120Ai	89229	http://downloads.hmpdacc.orglocal/db/repository/ncbi/dacc_reference_genomes/20141006/89229/89229.APDF01000001-APDF01000075.cds.fsa	http://downloads.hmpdacc.orglocal/db/repository/ncbi/dacc_reference_genomes/20141006/89229/89229.KB644417-KB644468.cds.fsa
Helicobacter pylori GAM121Aii	89231	http://downloads.hmpdacc.orglocal/db/repository/ncbi/dacc_reference_genomes/20141006/89231/89231.APDG01000001-APDG01000081.cds.fsa	http://downloads.hmpdacc.orglocal/db/repository/ncbi/dacc_reference_genomes/20141006/89231/89231.KB636362-KB636412.cds.fsa
Helicobacter pylori GAM201Ai	89233	http://downloads.hmpdacc.orglocal/db/repository/ncbi/dacc_reference_genomes/20141006/89233/89233.APDC01000001-APDC01000077.cds.fsa	http://downloads.hmpdacc.orglocal/db/repository/ncbi/dacc_reference_genomes/20141006/89233/89233.KB641870-KB641918.cds.fsa
Helicobacter pylori GAM210Bi	89235	http://downloads.hmpdacc.orglocal/db/repository/ncbi/dacc_reference_genomes/20141006/89235/89235.APDH01000001-APDH01000091.cds.fsa	http://downloads.hmpdacc.orglocal/db/repository/ncbi/dacc_reference_genomes/20141006/89235/89235.KB642825-KB642875.cds.fsa
Helicobacter pylori GAM231Ai	89237	http://downloads.hmpdacc.orglocal/db/repository/ncbi/dacc_reference_genomes/20141006/89237/89237.APDI01000001-APDI01000098.cds.fsa	http://downloads.hmpdacc.orglocal/db/repository/ncbi/dacc_reference_genomes/20141006/89237/89237.KB641666-KB641724.cds.fsa
Helicobacter pylori GAM239Bi	89239	http://downloads.hmpdacc.orglocal/db/repository/ncbi/dacc_reference_genomes/20141006/89239/89239.APDJ01000001-APDJ01000091.cds.fsa	http://downloads.hmpdacc.orglocal/db/repository/ncbi/dacc_reference_genomes/20141006/89239/89239.KB636292-KB636361.cds.fsa
Helicobacter pylori GAM244Ai	89241	http://downloads.hmpdacc.orglocal/db/repository/ncbi/dacc_reference_genomes/20141006/89241/89241.APDK01000001-APDK01000095.cds.fsa	http://downloads.hmpdacc.orglocal/db/repository/ncbi/dacc_reference_genomes/20141006/89241/89241.KB636663-KB636727.cds.fsa
Helicobacter pylori GAM245Ai	89243	http://downloads.hmpdacc.orglocal/db/repository/ncbi/dacc_reference_genomes/20141006/89243/89243.APDL01000001-APDL01000078.cds.fsa	http://downloads.hmpdacc.orglocal/db/repository/ncbi/dacc_reference_genomes/20141006/89243/89243.KB636503-KB636552.cds.fsa
Helicobacter pylori GAM246Ai	89245	http://downloads.hmpdacc.orglocal/db/repository/ncbi/dacc_reference_genomes/20141006/89245/89245.APDM01000001-APDM01000102.cds.fsa	http://downloads.hmpdacc.orglocal/db/repository/ncbi/dacc_reference_genomes/20141006/89245/89245.KB636246-KB636291.cds.fsa
Helicobacter pylori GAM249T	89247	http://downloads.hmpdacc.orglocal/db/repository/ncbi/dacc_reference_genomes/20141006/89247/89247.APDN01000001-APDN01000082.cds.fsa	http://downloads.hmpdacc.orglocal/db/repository/ncbi/dacc_reference_genomes/20141006/89247/89247.KB636061-KB636100.cds.fsa
Helicobacter pylori GAM250AFi	89249	http://downloads.hmpdacc.orglocal/db/repository/ncbi/dacc_reference_genomes/20141006/89249/89249.APDO01000001-APDO01000071.cds.fsa	http://downloads.hmpdacc.orglocal/db/repository/ncbi/dacc_reference_genomes/20141006/89249/89249.KB635969-KB636014.cds.fsa
Helicobacter pylori GAM250T	89251	http://downloads.hmpdacc.orglocal/db/repository/ncbi/dacc_reference_genomes/20141006/89251/89251.APDP01000001-APDP01000073.cds.fsa	http://downloads.hmpdacc.orglocal/db/repository/ncbi/dacc_reference_genomes/20141006/89251/89251.KB635919-KB635968.cds.fsa
Helicobacter pylori GAM252Bi	89253	http://downloads.hmpdacc.orglocal/db/repository/ncbi/dacc_reference_genomes/20141006/89253/89253.APDQ01000001-APDQ01000072.cds.fsa	http://downloads.hmpdacc.orglocal/db/repository/ncbi/dacc_reference_genomes/20141006/89253/89253.KB636413-KB636459.cds.fsa
Helicobacter pylori GAM252T	89255	http://downloads.hmpdacc.orglocal/db/repository/ncbi/dacc_reference_genomes/20141006/89255/89255.APDR01000001-APDR01000078.cds.fsa	http://downloads.hmpdacc.orglocal/db/repository/ncbi/dacc_reference_genomes/20141006/89255/89255.KB636553-KB636602.cds.fsa
Helicobacter pylori GAM254Ai	89257	http://downloads.hmpdacc.orglocal/db/repository/ncbi/dacc_reference_genomes/20141006/89257/89257.APDS01000001-APDS01000075.cds.fsa	http://downloads.hmpdacc.orglocal/db/repository/ncbi/dacc_reference_genomes/20141006/89257/89257.KB636728-KB636775.cds.fsa
Helicobacter pylori GAM260ASi	89259	http://downloads.hmpdacc.orglocal/db/repository/ncbi/dacc_reference_genomes/20141006/89259/89259.APDT01000001-APDT01000086.cds.fsa	http://downloads.hmpdacc.orglocal/db/repository/ncbi/dacc_reference_genomes/20141006/89259/89259.KB636603-KB636662.cds.fsa
Helicobacter pylori GAM260Bi	89261	http://downloads.hmpdacc.orglocal/db/repository/ncbi/dacc_reference_genomes/20141006/89261/89261.APDU01000001-APDU01000087.cds.fsa	http://downloads.hmpdacc.orglocal/db/repository/ncbi/dacc_reference_genomes/20141006/89261/89261.KB636829-KB636883.cds.fsa
Helicobacter pylori GAM260BSi	89263	http://downloads.hmpdacc.orglocal/db/repository/ncbi/dacc_reference_genomes/20141006/89263/89263.APDV01000001-APDV01000089.cds.fsa	http://downloads.hmpdacc.orglocal/db/repository/ncbi/dacc_reference_genomes/20141006/89263/89263.KB636929-KB636985.cds.fsa
Helicobacter pylori GAM263BFi	89265	http://downloads.hmpdacc.orglocal/db/repository/ncbi/dacc_reference_genomes/20141006/89265/89265.APDW01000001-APDW01000075.cds.fsa	http://downloads.hmpdacc.orglocal/db/repository/ncbi/dacc_reference_genomes/20141006/89265/89265.KB642776-KB642824.cds.fsa
Helicobacter pylori GAM264Ai	89267	http://downloads.hmpdacc.orglocal/db/repository/ncbi/dacc_reference_genomes/20141006/89267/89267.APDX01000001-APDX01000092.cds.fsa	http://downloads.hmpdacc.orglocal/db/repository/ncbi/dacc_reference_genomes/20141006/89267/89267.KB642518-KB642560.cds.fsa
Helicobacter pylori GAM265BSii	89269	http://downloads.hmpdacc.orglocal/db/repository/ncbi/dacc_reference_genomes/20141006/89269/89269.APDY01000001-APDY01000091.cds.fsa	http://downloads.hmpdacc.orglocal/db/repository/ncbi/dacc_reference_genomes/20141006/89269/89269.KB642295-KB642350.cds.fsa
Helicobacter pylori GAM268Bii	89271	http://downloads.hmpdacc.orglocal/db/repository/ncbi/dacc_reference_genomes/20141006/89271/89271.APDZ01000001-APDZ01000124.cds.fsa	http://downloads.hmpdacc.orglocal/db/repository/ncbi/dacc_reference_genomes/20141006/89271/89271.KB642612-KB642676.cds.fsa
Helicobacter pylori GAM270ASi	89273	http://downloads.hmpdacc.orglocal/db/repository/ncbi/dacc_reference_genomes/20141006/89273/89273.APEA01000001-APEA01000087.cds.fsa	http://downloads.hmpdacc.orglocal/db/repository/ncbi/dacc_reference_genomes/20141006/89273/89273.KB641775-KB641818.cds.fsa
Helicobacter pylori GAM42Ai	89275	http://downloads.hmpdacc.orglocal/db/repository/ncbi/dacc_reference_genomes/20141006/89275/89275.APEB01000001-APEB01000080.cds.fsa	http://downloads.hmpdacc.orglocal/db/repository/ncbi/dacc_reference_genomes/20141006/89275/89275.KB642129-KB642171.cds.fsa
Helicobacter pylori GAM71Ai	89277	http://downloads.hmpdacc.orglocal/db/repository/ncbi/dacc_reference_genomes/20141006/89277/89277.APEC01000001-APEC01000124.cds.fsa	http://downloads.hmpdacc.orglocal/db/repository/ncbi/dacc_reference_genomes/20141006/89277/89277.KB642008-KB642078.cds.fsa
Helicobacter pylori GAM80Ai	89279	http://downloads.hmpdacc.orglocal/db/repository/ncbi/dacc_reference_genomes/20141006/89279/89279.APED01000001-APED01000074.cds.fsa	http://downloads.hmpdacc.orglocal/db/repository/ncbi/dacc_reference_genomes/20141006/89279/89279.KB641964-KB642007.cds.fsa
Helicobacter pylori GAM83Bi	89281	http://downloads.hmpdacc.orglocal/db/repository/ncbi/dacc_reference_genomes/20141006/89281/89281.APEE01000001-APEE01000081.cds.fsa	http://downloads.hmpdacc.orglocal/db/repository/ncbi/dacc_reference_genomes/20141006/89281/89281.KB641725-KB641774.cds.fsa
Helicobacter pylori GAM83T	89283	http://downloads.hmpdacc.orglocal/db/repository/ncbi/dacc_reference_genomes/20141006/89283/89283.APEF01000001-APEF01000083.cds.fsa	http://downloads.hmpdacc.orglocal/db/repository/ncbi/dacc_reference_genomes/20141006/89283/89283.KB641919-KB641963.cds.fsa
Helicobacter pylori GAM93Bi	89285	http://downloads.hmpdacc.orglocal/db/repository/ncbi/dacc_reference_genomes/20141006/89285/89285.APEG01000001-APEG01000136.cds.fsa	http://downloads.hmpdacc.orglocal/db/repository/ncbi/dacc_reference_genomes/20141006/89285/89285.KB642079-KB642128.cds.fsa
Helicobacter pylori GAM96Ai	89287	http://downloads.hmpdacc.orglocal/db/repository/ncbi/dacc_reference_genomes/20141006/89287/89287.APEH01000001-APEH01000112.cds.fsa	http://downloads.hmpdacc.orglocal/db/repository/ncbi/dacc_reference_genomes/20141006/89287/89287.KB642172-KB642243.cds.fsa
Helicobacter pylori GAMchJs106B	89289	http://downloads.hmpdacc.orglocal/db/repository/ncbi/dacc_reference_genomes/20141006/89289/89289.APEI01000001-APEI01000061.cds.fsa	http://downloads.hmpdacc.orglocal/db/repository/ncbi/dacc_reference_genomes/20141006/89289/89289.KB642351-KB642382.cds.fsa
Helicobacter pylori GAMchJs114i	89291	http://downloads.hmpdacc.orglocal/db/repository/ncbi/dacc_reference_genomes/20141006/89291/89291.APEJ01000001-APEJ01000076.cds.fsa	http://downloads.hmpdacc.orglocal/db/repository/ncbi/dacc_reference_genomes/20141006/89291/89291.KB644576-KB644628.cds.fsa
Helicobacter pylori GAMchJs117Ai	89293	http://downloads.hmpdacc.orglocal/db/repository/ncbi/dacc_reference_genomes/20141006/89293/89293.APEK01000001-APEK01000073.cds.fsa	http://downloads.hmpdacc.orglocal/db/repository/ncbi/dacc_reference_genomes/20141006/89293/89293.KB644741-KB644790.cds.fsa
Helicobacter pylori GAMchJs124i	89295	http://downloads.hmpdacc.orglocal/db/repository/ncbi/dacc_reference_genomes/20141006/89295/89295.APEL01000001-APEL01000077.cds.fsa	http://downloads.hmpdacc.orglocal/db/repository/ncbi/dacc_reference_genomes/20141006/89295/89295.KB644692-KB644740.cds.fsa
Helicobacter pylori GAMchJs136i	89299	http://downloads.hmpdacc.orglocal/db/repository/ncbi/dacc_reference_genomes/20141006/89299/89299.APEM01000001-APEM01000086.cds.fsa	http://downloads.hmpdacc.orglocal/db/repository/ncbi/dacc_reference_genomes/20141006/89299/89299.KB644629-KB644691.cds.fsa
Helicobacter pylori HP116Bi	89301	http://downloads.hmpdacc.orglocal/db/repository/ncbi/dacc_reference_genomes/20141006/89301/89301.APEN01000001-APEN01000072.cds.fsa	http://downloads.hmpdacc.orglocal/db/repository/ncbi/dacc_reference_genomes/20141006/89301/89301.KB642244-KB642294.cds.fsa
Helicobacter pylori HP250AFii	89303	http://downloads.hmpdacc.orglocal/db/repository/ncbi/dacc_reference_genomes/20141006/89303/89303.APEO01000001-APEO01000076.cds.fsa	http://downloads.hmpdacc.orglocal/db/repository/ncbi/dacc_reference_genomes/20141006/89303/89303.KB642414-KB642459.cds.fsa
Helicobacter pylori HP250AFiii	89305	http://downloads.hmpdacc.orglocal/db/repository/ncbi/dacc_reference_genomes/20141006/89305/89305.APEP01000001-APEP01000074.cds.fsa	http://downloads.hmpdacc.orglocal/db/repository/ncbi/dacc_reference_genomes/20141006/89305/89305.KB642561-KB642611.cds.fsa
Helicobacter pylori HP250AFiV	89307	http://downloads.hmpdacc.orglocal/db/repository/ncbi/dacc_reference_genomes/20141006/89307/89307.APEQ01000001-APEQ01000073.cds.fsa	http://downloads.hmpdacc.orglocal/db/repository/ncbi/dacc_reference_genomes/20141006/89307/89307.KB642733-KB642775.cds.fsa
Helicobacter pylori HP250ASi	89309	http://downloads.hmpdacc.orglocal/db/repository/ncbi/dacc_reference_genomes/20141006/89309/89309.APER01000001-APER01000077.cds.fsa	http://downloads.hmpdacc.orglocal/db/repository/ncbi/dacc_reference_genomes/20141006/89309/89309.KB636195-KB636245.cds.fsa
Helicobacter pylori HP250ASii	89311	http://downloads.hmpdacc.orglocal/db/repository/ncbi/dacc_reference_genomes/20141006/89311/89311.APES01000001-APES01000078.cds.fsa	http://downloads.hmpdacc.orglocal/db/repository/ncbi/dacc_reference_genomes/20141006/89311/89311.KB636101-KB636144.cds.fsa
Helicobacter pylori HP250BFi	89313	http://downloads.hmpdacc.orglocal/db/repository/ncbi/dacc_reference_genomes/20141006/89313/89313.APET01000001-APET01000135.cds.fsa	http://downloads.hmpdacc.orglocal/db/repository/ncbi/dacc_reference_genomes/20141006/89313/89313.KB636145-KB636194.cds.fsa
Helicobacter pylori HP250BFii	89315	http://downloads.hmpdacc.orglocal/db/repository/ncbi/dacc_reference_genomes/20141006/89315/89315.APEU01000001-APEU01000073.cds.fsa	http://downloads.hmpdacc.orglocal/db/repository/ncbi/dacc_reference_genomes/20141006/89315/89315.KB636460-KB636502.cds.fsa
Helicobacter pylori HP250BFiii	89317	http://downloads.hmpdacc.orglocal/db/repository/ncbi/dacc_reference_genomes/20141006/89317/89317.APEV01000001-APEV01000077.cds.fsa	http://downloads.hmpdacc.orglocal/db/repository/ncbi/dacc_reference_genomes/20141006/89317/89317.KB642876-KB642922.cds.fsa
Helicobacter pylori HP250BFiV	89319	http://downloads.hmpdacc.orglocal/db/repository/ncbi/dacc_reference_genomes/20141006/89319/89319.APEW01000001-APEW01000091.cds.fsa	http://downloads.hmpdacc.orglocal/db/repository/ncbi/dacc_reference_genomes/20141006/89319/89319.KB636015-KB636060.cds.fsa
Helicobacter pylori HP250BSi	89321	http://downloads.hmpdacc.orglocal/db/repository/ncbi/dacc_reference_genomes/20141006/89321/89321.APEX01000001-APEX01000093.cds.fsa	http://downloads.hmpdacc.orglocal/db/repository/ncbi/dacc_reference_genomes/20141006/89321/89321.KB644261-KB644309.cds.fsa
Helicobacter pylori HP260AFi	89323	http://downloads.hmpdacc.orglocal/db/repository/ncbi/dacc_reference_genomes/20141006/89323/89323.APEY01000001-APEY01000075.cds.fsa	http://downloads.hmpdacc.orglocal/db/repository/ncbi/dacc_reference_genomes/20141006/89323/89323.KB644205-KB644260.cds.fsa
Helicobacter pylori HP260AFii	89325	http://downloads.hmpdacc.orglocal/db/repository/ncbi/dacc_reference_genomes/20141006/89325/89325.APEZ01000001-APEZ01000081.cds.fsa	http://downloads.hmpdacc.orglocal/db/repository/ncbi/dacc_reference_genomes/20141006/89325/89325.KB642460-KB642517.cds.fsa
Helicobacter pylori HP260ASii	89327	http://downloads.hmpdacc.orglocal/db/repository/ncbi/dacc_reference_genomes/20141006/89327/89327.APFA01000001-APFA01000086.cds.fsa	http://downloads.hmpdacc.orglocal/db/repository/ncbi/dacc_reference_genomes/20141006/89327/89327.KB642677-KB642732.cds.fsa
Helicobacter pylori HP260BFii	89329	http://downloads.hmpdacc.orglocal/db/repository/ncbi/dacc_reference_genomes/20141006/89329/89329.APFB01000001-APFB01000072.cds.fsa	http://downloads.hmpdacc.orglocal/db/repository/ncbi/dacc_reference_genomes/20141006/89329/89329.KB635868-KB635918.cds.fsa
Helicobacter pylori HP260Bi	89331	http://downloads.hmpdacc.orglocal/db/repository/ncbi/dacc_reference_genomes/20141006/89331/89331.APFC01000001-APFC01000082.cds.fsa	http://downloads.hmpdacc.orglocal/db/repository/ncbi/dacc_reference_genomes/20141006/89331/89331.KB635814-KB635867.cds.fsa
Helicobacter winghamensis ATCC BAA-430	32491	http://downloads.hmpdacc.orglocal/db/repository/ncbi/dacc_reference_genomes/20141006/32491/32491.ACDO01000001-ACDO01000055.cds.fsa	http://downloads.hmpdacc.orglocal/db/repository/ncbi/dacc_reference_genomes/20141006/32491/32491.GG661973-GG661993.cds.fsa
Holdemania filiformis DSM 12042	30361	http://downloads.hmpdacc.orglocal/db/repository/ncbi/dacc_reference_genomes/20141006/30361/30361.ACCF01000001-ACCF01000289.cds.fsa	http://downloads.hmpdacc.orglocal/db/repository/ncbi/dacc_reference_genomes/20141006/30361/30361.GG657551-GG657585.cds.fsa
Intestinibacter bartlettii DSM 16795	19661	http://downloads.hmpdacc.orglocal/db/repository/ncbi/dacc_reference_genomes/20141006/19661/19661.ABEZ02000001-ABEZ02000022.cds.fsa	http://downloads.hmpdacc.orglocal/db/repository/ncbi/dacc_reference_genomes/20141006/19661/19661.DS499552-DS499569.cds.fsa
Klebsiella pneumoniae subsp. pneumoniae WGLW3	169455	http://downloads.hmpdacc.orglocal/db/repository/ncbi/dacc_reference_genomes/20141006/169455/169455.AMLN01000001-AMLN01000023.cds.fsa	http://downloads.hmpdacc.orglocal/db/repository/ncbi/dacc_reference_genomes/20141006/169455/169455.JH930422-JH930427.cds.fsa
Klebsiella pneumoniae subsp. pneumoniae WGLW5	169456	http://downloads.hmpdacc.orglocal/db/repository/ncbi/dacc_reference_genomes/20141006/169456/169456.AMLO01000001-AMLO01000034.cds.fsa	http://downloads.hmpdacc.orglocal/db/repository/ncbi/dacc_reference_genomes/20141006/169456/169456.JH930428-JH930437.cds.fsa
Klebsiella sp. 1_1_55	40049	http://downloads.hmpdacc.orglocal/db/repository/ncbi/dacc_reference_genomes/20141006/40049/40049.ACXA01000001-ACXA01000096.cds.fsa	http://downloads.hmpdacc.orglocal/db/repository/ncbi/dacc_reference_genomes/20141006/40049/40049.GG745508-GG745526.cds.fsa
Klebsiella sp. 4_1_44FAA	40025	http://downloads.hmpdacc.orglocal/db/repository/ncbi/dacc_reference_genomes/20141006/40025/40025.ACWO01000001-ACWO01000195.cds.fsa	http://downloads.hmpdacc.orglocal/db/repository/ncbi/dacc_reference_genomes/20141006/40025/40025.JH414798-JH414875.cds.fsa
Klebsiella sp. MS 92-3	47223	http://downloads.hmpdacc.orglocal/db/repository/ncbi/dacc_reference_genomes/20141006/47223/47223.AFBO01000001-AFBO01000871.cds.fsa	http://downloads.hmpdacc.orglocal/db/repository/ncbi/dacc_reference_genomes/20141006/47223/47223.GL882699-GL882878.cds.fsa
Lachnospiraceae bacterium 1_1_57FAA	39377	http://downloads.hmpdacc.orglocal/db/repository/ncbi/dacc_reference_genomes/20141006/39377/39377.ACTM01000001-ACTM01000092.cds.fsa	http://downloads.hmpdacc.orglocal/db/repository/ncbi/dacc_reference_genomes/20141006/39377/39377.GL945294-GL945332.cds.fsa
Lachnospiraceae bacterium 1_4_56FAA	39379	http://downloads.hmpdacc.orglocal/db/repository/ncbi/dacc_reference_genomes/20141006/39379/39379.ACTN01000001-ACTN01000045.cds.fsa	http://downloads.hmpdacc.orglocal/db/repository/ncbi/dacc_reference_genomes/20141006/39379/39379.GL945163-GL945194.cds.fsa
Lachnospiraceae bacterium 2_1_46FAA	46369	http://downloads.hmpdacc.orglocal/db/repository/ncbi/dacc_reference_genomes/20141006/46369/46369.ADLB02000001-ADLB02000009.cds.fsa	http://downloads.hmpdacc.orglocal/db/repository/ncbi/dacc_reference_genomes/20141006/46369/46369.KE150017.cds.fsa
Lachnospiraceae bacterium 2_1_58FAA	39381	http://downloads.hmpdacc.orglocal/db/repository/ncbi/dacc_reference_genomes/20141006/39381/39381.ACTO01000001-ACTO01000090.cds.fsa	http://downloads.hmpdacc.orglocal/db/repository/ncbi/dacc_reference_genomes/20141006/39381/39381.GL945333-GL945373.cds.fsa
Lachnospiraceae bacterium 3_1_46FAA	40027	http://downloads.hmpdacc.orglocal/db/repository/ncbi/dacc_reference_genomes/20141006/40027/40027.ACWP01000001-ACWP01000080.cds.fsa	http://downloads.hmpdacc.orglocal/db/repository/ncbi/dacc_reference_genomes/20141006/40027/40027.GL890520-GL890547.cds.fsa
Lachnospiraceae bacterium 3_1_57FAA_CT1	39383	http://downloads.hmpdacc.orglocal/db/repository/ncbi/dacc_reference_genomes/20141006/39383/39383.ACTP02000001-ACTP02000023.cds.fsa	http://downloads.hmpdacc.orglocal/db/repository/ncbi/dacc_reference_genomes/20141006/39383/39383.KE150405-KE150411.cds.fsa
Lachnospiraceae bacterium 5_1_57FAA	39387	http://downloads.hmpdacc.orglocal/db/repository/ncbi/dacc_reference_genomes/20141006/39387/39387.ACTR01000001-ACTR01000064.cds.fsa	http://downloads.hmpdacc.orglocal/db/repository/ncbi/dacc_reference_genomes/20141006/39387/39387.GL945243-GL945293.cds.fsa
Lachnospiraceae bacterium 5_1_63FAA	39389	http://downloads.hmpdacc.orglocal/db/repository/ncbi/dacc_reference_genomes/20141006/39389/39389.ACTS01000001-ACTS01000094.cds.fsa	http://downloads.hmpdacc.orglocal/db/repository/ncbi/dacc_reference_genomes/20141006/39389/39389.GL622401-GL622448.cds.fsa
Lachnospiraceae bacterium 6_1_37FAA	41967	http://downloads.hmpdacc.orglocal/db/repository/ncbi/dacc_reference_genomes/20141006/41967/41967.ADCR01000001-ADCR01000038.cds.fsa	http://downloads.hmpdacc.orglocal/db/repository/ncbi/dacc_reference_genomes/20141006/41967/41967.GL872349-GL872363.cds.fsa
Lachnospiraceae bacterium 6_1_63FAA	39395	http://downloads.hmpdacc.orglocal/db/repository/ncbi/dacc_reference_genomes/20141006/39395/39395.ACTV01000001-ACTV01000037.cds.fsa	http://downloads.hmpdacc.orglocal/db/repository/ncbi/dacc_reference_genomes/20141006/39395/39395.GL890548-GL890570.cds.fsa
Lachnospiraceae bacterium 7_1_58FAA	39397	http://downloads.hmpdacc.orglocal/db/repository/ncbi/dacc_reference_genomes/20141006/39397/39397.ACTW01000001-ACTW01000210.cds.fsa	http://downloads.hmpdacc.orglocal/db/repository/ncbi/dacc_reference_genomes/20141006/39397/39397.JH590866-JH590967.cds.fsa
Lachnospiraceae bacterium 8_1_57FAA	40029	http://downloads.hmpdacc.orglocal/db/repository/ncbi/dacc_reference_genomes/20141006/40029/40029.ACWQ01000001-ACWQ01000115.cds.fsa	http://downloads.hmpdacc.orglocal/db/repository/ncbi/dacc_reference_genomes/20141006/40029/40029.GL622449-GL622499.cds.fsa
Lachnospiraceae bacterium 9_1_43BFAA	39399	http://downloads.hmpdacc.orglocal/db/repository/ncbi/dacc_reference_genomes/20141006/39399/39399.ACTX01000001-ACTX01000026.cds.fsa	http://downloads.hmpdacc.orglocal/db/repository/ncbi/dacc_reference_genomes/20141006/39399/39399.GL890571-GL890582.cds.fsa
Lactobacillus acidophilus ATCC 4796	31477	http://downloads.hmpdacc.orglocal/db/repository/ncbi/dacc_reference_genomes/20141006/31477/31477.ACHN01000001-ACHN01000069.cds.fsa	http://downloads.hmpdacc.orglocal/db/repository/ncbi/dacc_reference_genomes/20141006/31477/31477.GG669566-GG669603.cds.fsa
Lactobacillus amylolyticus DSM 11664	34615	http://downloads.hmpdacc.orglocal/db/repository/ncbi/dacc_reference_genomes/20141006/34615/34615.ADNY01000001-ADNY01000073.cds.fsa
Lactobacillus antri DSM 16041	31479	http://downloads.hmpdacc.orglocal/db/repository/ncbi/dacc_reference_genomes/20141006/31479/31479.ACLL01000001-ACLL01000076.cds.fsa	http://downloads.hmpdacc.orglocal/db/repository/ncbi/dacc_reference_genomes/20141006/31479/31479.GG700732-GG700751.cds.fsa
Lactobacillus brevis subsp. gravesensis ATCC 27305	31481	http://downloads.hmpdacc.orglocal/db/repository/ncbi/dacc_reference_genomes/20141006/31481/31481.ACGG01000001-ACGG01000178.cds.fsa	http://downloads.hmpdacc.orglocal/db/repository/ncbi/dacc_reference_genomes/20141006/31481/31481.GG669604-GG669709.cds.fsa
Lactobacillus buchneri ATCC 11577	31483	http://downloads.hmpdacc.orglocal/db/repository/ncbi/dacc_reference_genomes/20141006/31483/31483.ACGH01000001-ACGH01000165.cds.fsa	http://downloads.hmpdacc.orglocal/db/repository/ncbi/dacc_reference_genomes/20141006/31483/31483.GG669710-GG669813.cds.fsa
Lactobacillus delbrueckii subsp. lactis DSM 20072	53001	http://downloads.hmpdacc.orglocal/db/repository/ncbi/dacc_reference_genomes/20141006/53001/53001.AEXU01000001-AEXU01000167.cds.fsa	http://downloads.hmpdacc.orglocal/db/repository/ncbi/dacc_reference_genomes/20141006/53001/53001.GL872382-GL872407.cds.fsa
Lactobacillus fermentum ATCC 14931	31485	http://downloads.hmpdacc.orglocal/db/repository/ncbi/dacc_reference_genomes/20141006/31485/31485.ACGI01000001-ACGI01000145.cds.fsa	http://downloads.hmpdacc.orglocal/db/repository/ncbi/dacc_reference_genomes/20141006/31485/31485.GG669900-GG669973.cds.fsa
Lactobacillus fermentum IFO 3956	18979		http://downloads.hmpdacc.orglocal/db/repository/ncbi/dacc_reference_genomes/20141006/18979/18979.AP008937.cds.fsa
Lactobacillus helveticus DSM 20075	34619	http://downloads.hmpdacc.orglocal/db/repository/ncbi/dacc_reference_genomes/20141006/34619/34619.ACLM01000001-ACLM01000235.cds.fsa	http://downloads.hmpdacc.orglocal/db/repository/ncbi/dacc_reference_genomes/20141006/34619/34619.GG700752-GG700800.cds.fsa
Lactobacillus hilgardii ATCC 8290	31489	http://downloads.hmpdacc.orglocal/db/repository/ncbi/dacc_reference_genomes/20141006/31489/31489.ACGP01000001-ACGP01000233.cds.fsa	http://downloads.hmpdacc.orglocal/db/repository/ncbi/dacc_reference_genomes/20141006/31489/31489.GG669992-GG670104.cds.fsa
Lactobacillus paracasei subsp. paracasei ATCC 25302	31513	http://downloads.hmpdacc.orglocal/db/repository/ncbi/dacc_reference_genomes/20141006/31513/31513.ACGY01000001-ACGY01000174.cds.fsa	http://downloads.hmpdacc.orglocal/db/repository/ncbi/dacc_reference_genomes/20141006/31513/31513.GG670152-GG670224.cds.fsa
Lactobacillus plantarum subsp. plantarum ATCC 14917 = JCM 1149 =	31515	http://downloads.hmpdacc.orglocal/db/repository/ncbi/dacc_reference_genomes/20141006/31515/31515.ACGZ02000001-ACGZ02000036.cds.fsa	http://downloads.hmpdacc.orglocal/db/repository/ncbi/dacc_reference_genomes/20141006/31515/31515.GL379761-GL379769.cds.fsa
Lactobacillus reuteri CF48-3A	31553	http://downloads.hmpdacc.orglocal/db/repository/ncbi/dacc_reference_genomes/20141006/31553/31553.ACHG01000001-ACHG01000244.cds.fsa	http://downloads.hmpdacc.orglocal/db/repository/ncbi/dacc_reference_genomes/20141006/31553/31553.GG693664-GG693755.cds.fsa
Lactobacillus reuteri JCM 1112	19011		http://downloads.hmpdacc.orglocal/db/repository/ncbi/dacc_reference_genomes/20141006/19011/19011.AP007281.cds.fsa
Lactobacillus reuteri MM2-3	34627	http://downloads.hmpdacc.orglocal/db/repository/ncbi/dacc_reference_genomes/20141006/34627/34627.ACLB01000001-ACLB01000167.cds.fsa	http://downloads.hmpdacc.orglocal/db/repository/ncbi/dacc_reference_genomes/20141006/34627/34627.GG693756-GG693850.cds.fsa
Lactobacillus reuteri MM4-1A	31511	http://downloads.hmpdacc.orglocal/db/repository/ncbi/dacc_reference_genomes/20141006/31511/31511.ACGX02000001-ACGX02000007.cds.fsa
Lactobacillus reuteri SD2112	30643		http://downloads.hmpdacc.orglocal/db/repository/ncbi/dacc_reference_genomes/20141006/30643/30643.CP002844.cds.fsa
Lactobacillus rhamnosus ATCC 21052	65127	http://downloads.hmpdacc.orglocal/db/repository/ncbi/dacc_reference_genomes/20141006/65127/65127.AFZY01000001-AFZY01000123.cds.fsa	http://downloads.hmpdacc.orglocal/db/repository/ncbi/dacc_reference_genomes/20141006/65127/65127.JH379478-JH379519.cds.fsa
Lactobacillus rhamnosus GG	40637		http://downloads.hmpdacc.orglocal/db/repository/ncbi/dacc_reference_genomes/20141006/40637/40637.AP011548.cds.fsa
Lactobacillus rhamnosus LMS2-1	31497	http://downloads.hmpdacc.orglocal/db/repository/ncbi/dacc_reference_genomes/20141006/31497/31497.ACIZ01000001-ACIZ01000162.cds.fsa	http://downloads.hmpdacc.orglocal/db/repository/ncbi/dacc_reference_genomes/20141006/31497/31497.GG692960-GG693014.cds.fsa
Lactobacillus ruminis ATCC 25644	31499	http://downloads.hmpdacc.orglocal/db/repository/ncbi/dacc_reference_genomes/20141006/31499/31499.ACGS02000001-ACGS02000058.cds.fsa	http://downloads.hmpdacc.orglocal/db/repository/ncbi/dacc_reference_genomes/20141006/31499/31499.GL833109-GL833115.cds.fsa
Lactobacillus sp. 7_1_47FAA	40031	http://downloads.hmpdacc.orglocal/db/repository/ncbi/dacc_reference_genomes/20141006/40031/40031.ACWR01000001-ACWR01000028.cds.fsa	http://downloads.hmpdacc.orglocal/db/repository/ncbi/dacc_reference_genomes/20141006/40031/40031.JH164952-JH164963.cds.fsa
Lactobacillus ultunensis DSM 16047	31505	http://downloads.hmpdacc.orglocal/db/repository/ncbi/dacc_reference_genomes/20141006/31505/31505.ACGU01000001-ACGU01000116.cds.fsa	http://downloads.hmpdacc.orglocal/db/repository/ncbi/dacc_reference_genomes/20141006/31505/31505.GG693253-GG693300.cds.fsa
Leuconostoc mesenteroides subsp. cremoris ATCC 19254	34629	http://downloads.hmpdacc.orglocal/db/repository/ncbi/dacc_reference_genomes/20141006/34629/34629.ACKV01000001-ACKV01000126.cds.fsa	http://downloads.hmpdacc.orglocal/db/repository/ncbi/dacc_reference_genomes/20141006/34629/34629.GG693383-GG693411.cds.fsa
Listeria grayi DSM 20601	31517	http://downloads.hmpdacc.orglocal/db/repository/ncbi/dacc_reference_genomes/20141006/31517/31517.ACCR02000001-ACCR02000006.cds.fsa	http://downloads.hmpdacc.orglocal/db/repository/ncbi/dacc_reference_genomes/20141006/31517/31517.GL538352-GL538355.cds.fsa
Listeria innocua ATCC 33091	65129	http://downloads.hmpdacc.orglocal/db/repository/ncbi/dacc_reference_genomes/20141006/65129/65129.AGCN01000001-AGCN01000045.cds.fsa	http://downloads.hmpdacc.orglocal/db/repository/ncbi/dacc_reference_genomes/20141006/65129/65129.JH556634-JH556650.cds.fsa
Marvinbryantia formatexigens DSM 14469	21051	http://downloads.hmpdacc.orglocal/db/repository/ncbi/dacc_reference_genomes/20141006/21051/21051.ACCL02000001-ACCL02000058.cds.fsa
Megamonas funiformis YIT 11815	46421	http://downloads.hmpdacc.orglocal/db/repository/ncbi/dacc_reference_genomes/20141006/46421/46421.ADMB01000001-ADMB01000116.cds.fsa	http://downloads.hmpdacc.orglocal/db/repository/ncbi/dacc_reference_genomes/20141006/46421/46421.JH601090-JH601102.cds.fsa
Megamonas hypermegale ART12/1	39163		http://downloads.hmpdacc.orglocal/db/repository/ncbi/dacc_reference_genomes/20141006/39163/39163.FP929048.cds.fsa
Methanobrevibacter smithii DSM 2374	29303	http://downloads.hmpdacc.orglocal/db/repository/ncbi/dacc_reference_genomes/20141006/29303/29303.ABYV02000001-ABYV02000025.cds.fsa	http://downloads.hmpdacc.orglocal/db/repository/ncbi/dacc_reference_genomes/20141006/29303/29303.GG704759-GG704768.cds.fsa
Methanobrevibacter smithii DSM 2375	27821	http://downloads.hmpdacc.orglocal/db/repository/ncbi/dacc_reference_genomes/20141006/27821/27821.ABYW01000001-ABYW01000024.cds.fsa	http://downloads.hmpdacc.orglocal/db/repository/ncbi/dacc_reference_genomes/20141006/27821/27821.DS996911-DS996919.cds.fsa
Mitsuokella multacida DSM 20544	28653	http://downloads.hmpdacc.orglocal/db/repository/ncbi/dacc_reference_genomes/20141006/28653/28653.ABWK02000001-ABWK02000031.cds.fsa	http://downloads.hmpdacc.orglocal/db/repository/ncbi/dacc_reference_genomes/20141006/28653/28653.GG697141-GG697146.cds.fsa
Neisseria macacae ATCC 33926	64729	http://downloads.hmpdacc.orglocal/db/repository/ncbi/dacc_reference_genomes/20141006/64729/64729.AFQE01000001-AFQE01000200.cds.fsa	http://downloads.hmpdacc.orglocal/db/repository/ncbi/dacc_reference_genomes/20141006/64729/64729.GL985618-GL985683.cds.fsa
Odoribacter laneus YIT 12061	46423	http://downloads.hmpdacc.orglocal/db/repository/ncbi/dacc_reference_genomes/20141006/46423/46423.ADMC01000001-ADMC01000042.cds.fsa	http://downloads.hmpdacc.orglocal/db/repository/ncbi/dacc_reference_genomes/20141006/46423/46423.JH594596-JH594604.cds.fsa
Oxalobacter formigenes HOxBLS	32497	http://downloads.hmpdacc.orglocal/db/repository/ncbi/dacc_reference_genomes/20141006/32497/32497.ACDP02000001-ACDP02000029.cds.fsa	http://downloads.hmpdacc.orglocal/db/repository/ncbi/dacc_reference_genomes/20141006/32497/32497.KI392030-KI392031.cds.fsa
Oxalobacter formigenes OXCC13	32499	http://downloads.hmpdacc.orglocal/db/repository/ncbi/dacc_reference_genomes/20141006/32499/32499.ACDQ01000001-ACDQ01000027.cds.fsa	http://downloads.hmpdacc.orglocal/db/repository/ncbi/dacc_reference_genomes/20141006/32499/32499.GG658170-GG658178.cds.fsa
Paenibacillus sp. HGF5	54029	http://downloads.hmpdacc.orglocal/db/repository/ncbi/dacc_reference_genomes/20141006/54029/54029.AEXS01000001-AEXS01000185.cds.fsa
Paenibacillus sp. HGF7	61827	http://downloads.hmpdacc.orglocal/db/repository/ncbi/dacc_reference_genomes/20141006/61827/61827.AFDH01000001-AFDH01000148.cds.fsa
Paenibacillus sp. HGH0039	72483	http://downloads.hmpdacc.orglocal/db/repository/ncbi/dacc_reference_genomes/20141006/72483/72483.AGEN01000001-AGEN01000048.cds.fsa	http://downloads.hmpdacc.orglocal/db/repository/ncbi/dacc_reference_genomes/20141006/72483/72483.KE150412-KE150416.cds.fsa
Paenisporosarcina sp. HGH0030	72489	http://downloads.hmpdacc.orglocal/db/repository/ncbi/dacc_reference_genomes/20141006/72489/72489.AGEQ01000001-AGEQ01000020.cds.fsa	http://downloads.hmpdacc.orglocal/db/repository/ncbi/dacc_reference_genomes/20141006/72489/72489.KE150421-KE150425.cds.fsa
Parabacteroides johnsonii DSM 18315	30007	http://downloads.hmpdacc.orglocal/db/repository/ncbi/dacc_reference_genomes/20141006/30007/30007.ABYH01000001-ABYH01000527.cds.fsa	http://downloads.hmpdacc.orglocal/db/repository/ncbi/dacc_reference_genomes/20141006/30007/30007.DS996440-DS996545.cds.fsa
Parabacteroides merdae ATCC 43184	18193	http://downloads.hmpdacc.orglocal/db/repository/ncbi/dacc_reference_genomes/20141006/18193/18193.AAXE02000001-AAXE02000118.cds.fsa	http://downloads.hmpdacc.orglocal/db/repository/ncbi/dacc_reference_genomes/20141006/18193/18193.DS264460-DS264552.cds.fsa
Parabacteroides sp. 2_1_7	32437	http://downloads.hmpdacc.orglocal/db/repository/ncbi/dacc_reference_genomes/20141006/32437/32437.ABZY01000001-ABZY01000106.cds.fsa	http://downloads.hmpdacc.orglocal/db/repository/ncbi/dacc_reference_genomes/20141006/32437/32437.EQ973175-EQ973212.cds.fsa
Parabacteroides sp. 20_3	38767	http://downloads.hmpdacc.orglocal/db/repository/ncbi/dacc_reference_genomes/20141006/38767/38767.ACRQ01000001-ACRQ01000125.cds.fsa	http://downloads.hmpdacc.orglocal/db/repository/ncbi/dacc_reference_genomes/20141006/38767/38767.GG774969-GG775029.cds.fsa
Parabacteroides sp. D13	38359	http://downloads.hmpdacc.orglocal/db/repository/ncbi/dacc_reference_genomes/20141006/38359/38359.ACPW01000001-ACPW01000074.cds.fsa	http://downloads.hmpdacc.orglocal/db/repository/ncbi/dacc_reference_genomes/20141006/38359/38359.GG698738-GG698759.cds.fsa
Paraprevotella clara YIT 11840	48501	http://downloads.hmpdacc.orglocal/db/repository/ncbi/dacc_reference_genomes/20141006/48501/48501.AFFY01000001-AFFY01000231.cds.fsa	http://downloads.hmpdacc.orglocal/db/repository/ncbi/dacc_reference_genomes/20141006/48501/48501.JH376577-JH376742.cds.fsa
Paraprevotella xylaniphila YIT 11841	48503	http://downloads.hmpdacc.orglocal/db/repository/ncbi/dacc_reference_genomes/20141006/48503/48503.AFBR01000001-AFBR01000099.cds.fsa	http://downloads.hmpdacc.orglocal/db/repository/ncbi/dacc_reference_genomes/20141006/48503/48503.GL883805-GL883891.cds.fsa
Parasutterella excrementihominis YIT 11859	48497	http://downloads.hmpdacc.orglocal/db/repository/ncbi/dacc_reference_genomes/20141006/48497/48497.AFBP01000001-AFBP01000103.cds.fsa	http://downloads.hmpdacc.orglocal/db/repository/ncbi/dacc_reference_genomes/20141006/48497/48497.GL883674-GL883766.cds.fsa
Parvimonas micra ATCC 33270	18169	http://downloads.hmpdacc.orglocal/db/repository/ncbi/dacc_reference_genomes/20141006/18169/18169.ABEE02000001-ABEE02000017.cds.fsa	http://downloads.hmpdacc.orglocal/db/repository/ncbi/dacc_reference_genomes/20141006/18169/18169.DS483504-DS483519.cds.fsa
Pediococcus acidilactici 7_4	40051	http://downloads.hmpdacc.orglocal/db/repository/ncbi/dacc_reference_genomes/20141006/40051/40051.ACXB01000001-ACXB01000028.cds.fsa	http://downloads.hmpdacc.orglocal/db/repository/ncbi/dacc_reference_genomes/20141006/40051/40051.GG730083-GG730091.cds.fsa
Pediococcus acidilactici DSM 20284	50527	http://downloads.hmpdacc.orglocal/db/repository/ncbi/dacc_reference_genomes/20141006/50527/50527.AEEG01000001-AEEG01000012.cds.fsa	http://downloads.hmpdacc.orglocal/db/repository/ncbi/dacc_reference_genomes/20141006/50527/50527.GL397067-GL397070.cds.fsa
Peptoclostridium difficile 70-100-2010	65135	http://downloads.hmpdacc.orglocal/db/repository/ncbi/dacc_reference_genomes/20141006/65135/65135.AGAC01000001-AGAC01000133.cds.fsa	http://downloads.hmpdacc.orglocal/db/repository/ncbi/dacc_reference_genomes/20141006/65135/65135.JH379227-JH379329.cds.fsa
Peptoclostridium difficile NAP07	31439	http://downloads.hmpdacc.orglocal/db/repository/ncbi/dacc_reference_genomes/20141006/31439/31439.ADVM01000001-ADVM01000100.cds.fsa	http://downloads.hmpdacc.orglocal/db/repository/ncbi/dacc_reference_genomes/20141006/31439/31439.GG770744-GG770776.cds.fsa
Peptoclostridium difficile NAP08	31441	http://downloads.hmpdacc.orglocal/db/repository/ncbi/dacc_reference_genomes/20141006/31441/31441.ADNX01000001-ADNX01000111.cds.fsa	http://downloads.hmpdacc.orglocal/db/repository/ncbi/dacc_reference_genomes/20141006/31441/31441.GG770710-GG770733.cds.fsa
Phascolarctobacterium succinatutens YIT 12067	48505	http://downloads.hmpdacc.orglocal/db/repository/ncbi/dacc_reference_genomes/20141006/48505/48505.AEVN01000001-AEVN01000118.cds.fsa	http://downloads.hmpdacc.orglocal/db/repository/ncbi/dacc_reference_genomes/20141006/48505/48505.GL830843-GL830938.cds.fsa
Prevotella copri DSM 18205	30025	http://downloads.hmpdacc.orglocal/db/repository/ncbi/dacc_reference_genomes/20141006/30025/30025.ACBX02000001-ACBX02000073.cds.fsa	http://downloads.hmpdacc.orglocal/db/repository/ncbi/dacc_reference_genomes/20141006/30025/30025.GG703852-GG703878.cds.fsa
Prevotella oralis HGA0225	169459	http://downloads.hmpdacc.orglocal/db/repository/ncbi/dacc_reference_genomes/20141006/169459/169459.ATFN01000001-ATFN01000021.cds.fsa	http://downloads.hmpdacc.orglocal/db/repository/ncbi/dacc_reference_genomes/20141006/169459/169459.KE340301-KE340307.cds.fsa
Prevotella salivae DSM 15606	53199	http://downloads.hmpdacc.orglocal/db/repository/ncbi/dacc_reference_genomes/20141006/53199/53199.AEQO00000000.cds.fsa
Prevotella stercorea DSM 18206	65131	http://downloads.hmpdacc.orglocal/db/repository/ncbi/dacc_reference_genomes/20141006/65131/65131.AFZZ01000001-AFZZ01000263.cds.fsa	http://downloads.hmpdacc.orglocal/db/repository/ncbi/dacc_reference_genomes/20141006/65131/65131.JH379330-JH379477.cds.fsa
Propionibacterium sp. 5_U_42AFAA	39413	http://downloads.hmpdacc.orglocal/db/repository/ncbi/dacc_reference_genomes/20141006/39413/39413.ACUE01000001-ACUE01000014.cds.fsa	http://downloads.hmpdacc.orglocal/db/repository/ncbi/dacc_reference_genomes/20141006/39413/39413.JH376566-JH376574.cds.fsa
Propionibacterium sp. HGH0353	169460	http://downloads.hmpdacc.orglocal/db/repository/ncbi/dacc_reference_genomes/20141006/169460/169460.ATFM01000001-ATFM01000007.cds.fsa	http://downloads.hmpdacc.orglocal/db/repository/ncbi/dacc_reference_genomes/20141006/169460/169460.KE340299-KE340300.cds.fsa
Proteus mirabilis WGLW6	169468	http://downloads.hmpdacc.orglocal/db/repository/ncbi/dacc_reference_genomes/20141006/169468/169468.AMGT01000001-AMGT01000054.cds.fsa	http://downloads.hmpdacc.orglocal/db/repository/ncbi/dacc_reference_genomes/20141006/169468/169468.JH815505-JH815512.cds.fsa
Proteus penneri ATCC 35198	20551	http://downloads.hmpdacc.orglocal/db/repository/ncbi/dacc_reference_genomes/20141006/20551/20551.ABVP01000001-ABVP01000026.cds.fsa	http://downloads.hmpdacc.orglocal/db/repository/ncbi/dacc_reference_genomes/20141006/20551/20551.GG661994-GG662004.cds.fsa
Providencia alcalifaciens DSM 30120	29297	http://downloads.hmpdacc.orglocal/db/repository/ncbi/dacc_reference_genomes/20141006/29297/29297.ABXW01000001-ABXW01000079.cds.fsa
Providencia rettgeri DSM 1131	29299	http://downloads.hmpdacc.orglocal/db/repository/ncbi/dacc_reference_genomes/20141006/29299/29299.ACCI02000001-ACCI02000177.cds.fsa	http://downloads.hmpdacc.orglocal/db/repository/ncbi/dacc_reference_genomes/20141006/29299/29299.GG705262-GG705293.cds.fsa
Providencia rustigianii DSM 4541	28651	http://downloads.hmpdacc.orglocal/db/repository/ncbi/dacc_reference_genomes/20141006/28651/28651.ABXV02000001-ABXV02000163.cds.fsa	http://downloads.hmpdacc.orglocal/db/repository/ncbi/dacc_reference_genomes/20141006/28651/28651.GG703817-GG703851.cds.fsa
Providencia stuartii ATCC 25827	20553	http://downloads.hmpdacc.orglocal/db/repository/ncbi/dacc_reference_genomes/20141006/20553/20553.ABJD02000001-ABJD02000120.cds.fsa	http://downloads.hmpdacc.orglocal/db/repository/ncbi/dacc_reference_genomes/20141006/20553/20553.DS607633-DS607684.cds.fsa
Pseudoflavonifractor capillosus ATCC 29799	18173	http://downloads.hmpdacc.orglocal/db/repository/ncbi/dacc_reference_genomes/20141006/18173/18173.AAXG02000001-AAXG02000066.cds.fsa
Pseudomonas sp. 2_1_26	40037	http://downloads.hmpdacc.orglocal/db/repository/ncbi/dacc_reference_genomes/20141006/40037/40037.ACWU01000001-ACWU01000295.cds.fsa	http://downloads.hmpdacc.orglocal/db/repository/ncbi/dacc_reference_genomes/20141006/40037/40037.JH376461-JH376511.cds.fsa
Ralstonia sp. 5_2_56FAA	39391	http://downloads.hmpdacc.orglocal/db/repository/ncbi/dacc_reference_genomes/20141006/39391/39391.ACTT02000001-ACTT02000029.cds.fsa	http://downloads.hmpdacc.orglocal/db/repository/ncbi/dacc_reference_genomes/20141006/39391/39391.JH815236-JH815252.cds.fsa
Ralstonia sp. 5_7_47FAA	39415	http://downloads.hmpdacc.orglocal/db/repository/ncbi/dacc_reference_genomes/20141006/39415/39415.ACUF01000001-ACUF01000093.cds.fsa	http://downloads.hmpdacc.orglocal/db/repository/ncbi/dacc_reference_genomes/20141006/39415/39415.GL520217-GL520248.cds.fsa
Roseburia intestinalis L1-82	30005	http://downloads.hmpdacc.orglocal/db/repository/ncbi/dacc_reference_genomes/20141006/30005/30005.ABYJ02000001-ABYJ02000409.cds.fsa	http://downloads.hmpdacc.orglocal/db/repository/ncbi/dacc_reference_genomes/20141006/30005/30005.GG692713-GG692814.cds.fsa
Roseburia intestinalis M50/1	39165		http://downloads.hmpdacc.orglocal/db/repository/ncbi/dacc_reference_genomes/20141006/39165/39165.FP929049.cds.fsa
Roseburia intestinalis XB6B4	45953		http://downloads.hmpdacc.orglocal/db/repository/ncbi/dacc_reference_genomes/20141006/45953/45953.FP929050.cds.fsa
Roseburia inulinivorans DSM 16841	30757	http://downloads.hmpdacc.orglocal/db/repository/ncbi/dacc_reference_genomes/20141006/30757/30757.ACFY01000001-ACFY01000179.cds.fsa
Ruminococcaceae bacterium D16	42541	http://downloads.hmpdacc.orglocal/db/repository/ncbi/dacc_reference_genomes/20141006/42541/42541.ADDX02000001-ADDX02000008.cds.fsa	http://downloads.hmpdacc.orglocal/db/repository/ncbi/dacc_reference_genomes/20141006/42541/42541.KI391947-KI391952.cds.fsa
Ruminococcus bromii L2-63	39153		http://downloads.hmpdacc.orglocal/db/repository/ncbi/dacc_reference_genomes/20141006/39153/39153.FP929051.cds.fsa
Ruminococcus champanellensis 18P13 = JCM 17042	39179		http://downloads.hmpdacc.orglocal/db/repository/ncbi/dacc_reference_genomes/20141006/39179/39179.FP929052.cds.fsa
Ruminococcus gnavus ATCC 29149	18179	http://downloads.hmpdacc.orglocal/db/repository/ncbi/dacc_reference_genomes/20141006/18179/18179.AAYG02000001-AAYG02000043.cds.fsa
Ruminococcus lactaris ATCC 29176	20557	http://downloads.hmpdacc.orglocal/db/repository/ncbi/dacc_reference_genomes/20141006/20557/20557.ABOU02000001-ABOU02000062.cds.fsa	http://downloads.hmpdacc.orglocal/db/repository/ncbi/dacc_reference_genomes/20141006/20557/20557.DS990163-DS990209.cds.fsa
Ruminococcus obeum A2-162	39167		http://downloads.hmpdacc.orglocal/db/repository/ncbi/dacc_reference_genomes/20141006/39167/39167.FP929054.cds.fsa
Ruminococcus obeum ATCC 29174	18147	http://downloads.hmpdacc.orglocal/db/repository/ncbi/dacc_reference_genomes/20141006/18147/18147.AAVO02000001-AAVO02000062.cds.fsa	http://downloads.hmpdacc.orglocal/db/repository/ncbi/dacc_reference_genomes/20141006/18147/18147.DS264289-DS264342.cds.fsa
Ruminococcus sp. 5_1_39BFAA	32503	http://downloads.hmpdacc.orglocal/db/repository/ncbi/dacc_reference_genomes/20141006/32503/32503.ACII02000001-ACII02000003.cds.fsa
Ruminococcus sp. SR1/5	39149		http://downloads.hmpdacc.orglocal/db/repository/ncbi/dacc_reference_genomes/20141006/39149/39149.FP929053.cds.fsa
Ruminococcus torques ATCC 27756	18153	http://downloads.hmpdacc.orglocal/db/repository/ncbi/dacc_reference_genomes/20141006/18153/18153.AAVP02000001-AAVP02000064.cds.fsa	http://downloads.hmpdacc.orglocal/db/repository/ncbi/dacc_reference_genomes/20141006/18153/18153.DS264343-DS264383.cds.fsa
Ruminococcus torques L2-14	39169		http://downloads.hmpdacc.orglocal/db/repository/ncbi/dacc_reference_genomes/20141006/39169/39169.FP929055.cds.fsa
Slackia piriformis YIT 12062	46425	http://downloads.hmpdacc.orglocal/db/repository/ncbi/dacc_reference_genomes/20141006/46425/46425.ADMD01000001-ADMD01000013.cds.fsa	http://downloads.hmpdacc.orglocal/db/repository/ncbi/dacc_reference_genomes/20141006/46425/46425.JH815198-JH815202.cds.fsa
Staphylococcus sp. HGB0015	72485	http://downloads.hmpdacc.orglocal/db/repository/ncbi/dacc_reference_genomes/20141006/72485/72485.AGEO01000001-AGEO01000032.cds.fsa	http://downloads.hmpdacc.orglocal/db/repository/ncbi/dacc_reference_genomes/20141006/72485/72485.KE150417-KE150420.cds.fsa
Streptococcus anginosus 1_2_62CV	46427	http://downloads.hmpdacc.orglocal/db/repository/ncbi/dacc_reference_genomes/20141006/46427/46427.ADME01000001-ADME01000018.cds.fsa	http://downloads.hmpdacc.orglocal/db/repository/ncbi/dacc_reference_genomes/20141006/46427/46427.GL636615-GL636621.cds.fsa
Streptococcus equinus ATCC 9812	52999	http://downloads.hmpdacc.orglocal/db/repository/ncbi/dacc_reference_genomes/20141006/52999/52999.AEVB01000001-AEVB01000057.cds.fsa	http://downloads.hmpdacc.orglocal/db/repository/ncbi/dacc_reference_genomes/20141006/52999/52999.GL698429-GL698448.cds.fsa
Streptococcus infantarius subsp. infantarius ATCC BAA-102	20527	http://downloads.hmpdacc.orglocal/db/repository/ncbi/dacc_reference_genomes/20141006/20527/20527.ABJK02000001-ABJK02000022.cds.fsa	http://downloads.hmpdacc.orglocal/db/repository/ncbi/dacc_reference_genomes/20141006/20527/20527.DS572674-DS572694.cds.fsa
Streptococcus sp. 2_1_36FAA	37947	http://downloads.hmpdacc.orglocal/db/repository/ncbi/dacc_reference_genomes/20141006/37947/37947.ACOI02000001-ACOI02000013.cds.fsa	http://downloads.hmpdacc.orglocal/db/repository/ncbi/dacc_reference_genomes/20141006/37947/37947.KI391972-KI391976.cds.fsa
Streptococcus sp. HPH0090	169485	http://downloads.hmpdacc.orglocal/db/repository/ncbi/dacc_reference_genomes/20141006/169485/169485.ATCD01000001-ATCD01000014.cds.fsa	http://downloads.hmpdacc.orglocal/db/repository/ncbi/dacc_reference_genomes/20141006/169485/169485.KE150464-KE150467.cds.fsa
Streptomyces sp. HGB0020	72491	http://downloads.hmpdacc.orglocal/db/repository/ncbi/dacc_reference_genomes/20141006/72491/72491.AGER01000001-AGER01000036.cds.fsa	http://downloads.hmpdacc.orglocal/db/repository/ncbi/dacc_reference_genomes/20141006/72491/72491.KE150426-KE150434.cds.fsa
Streptomyces sp. HPH0547	169487	http://downloads.hmpdacc.orglocal/db/repository/ncbi/dacc_reference_genomes/20141006/169487/169487.ATCE01000001-ATCE01000068.cds.fsa	http://downloads.hmpdacc.orglocal/db/repository/ncbi/dacc_reference_genomes/20141006/169487/169487.KE150468-KE150479.cds.fsa
Subdoligranulum sp. 4_3_54A2FAA	40041	http://downloads.hmpdacc.orglocal/db/repository/ncbi/dacc_reference_genomes/20141006/40041/40041.ACWW01000001-ACWW01000103.cds.fsa	http://downloads.hmpdacc.orglocal/db/repository/ncbi/dacc_reference_genomes/20141006/40041/40041.JH414698-JH414707.cds.fsa
Subdoligranulum variabile DSM 15176	18181	http://downloads.hmpdacc.orglocal/db/repository/ncbi/dacc_reference_genomes/20141006/18181/18181.ACBY02000001-ACBY02000091.cds.fsa	http://downloads.hmpdacc.orglocal/db/repository/ncbi/dacc_reference_genomes/20141006/18181/18181.GG704769-GG704779.cds.fsa
Succinatimonas hippei YIT 12066	48507	http://downloads.hmpdacc.orglocal/db/repository/ncbi/dacc_reference_genomes/20141006/48507/48507.AEVO01000001-AEVO01000169.cds.fsa	http://downloads.hmpdacc.orglocal/db/repository/ncbi/dacc_reference_genomes/20141006/48507/48507.GL830939-GL831079.cds.fsa
Sutterella parvirubra YIT 11816	48499	http://downloads.hmpdacc.orglocal/db/repository/ncbi/dacc_reference_genomes/20141006/48499/48499.AFBQ01000001-AFBQ01000391.cds.fsa	http://downloads.hmpdacc.orglocal/db/repository/ncbi/dacc_reference_genomes/20141006/48499/48499.JH604835-JH605022.cds.fsa
Sutterella wadsworthensis 2_1_59BFAA	46431	http://downloads.hmpdacc.orglocal/db/repository/ncbi/dacc_reference_genomes/20141006/46431/46431.ADMG01000001-ADMG01000059.cds.fsa	http://downloads.hmpdacc.orglocal/db/repository/ncbi/dacc_reference_genomes/20141006/46431/46431.JH815513-JH815523.cds.fsa
Sutterella wadsworthensis 3_1_45B	46429	http://downloads.hmpdacc.orglocal/db/repository/ncbi/dacc_reference_genomes/20141006/46429/46429.ADMF01000001-ADMF01000061.cds.fsa	http://downloads.hmpdacc.orglocal/db/repository/ncbi/dacc_reference_genomes/20141006/46429/46429.GL636540-GL636576.cds.fsa
Sutterella wadsworthensis HGA0223	169488	http://downloads.hmpdacc.orglocal/db/repository/ncbi/dacc_reference_genomes/20141006/169488/169488.ATCF01000001-ATCF01000039.cds.fsa	http://downloads.hmpdacc.orglocal/db/repository/ncbi/dacc_reference_genomes/20141006/169488/169488.KE150480-KE150482.cds.fsa
Synergistes sp. 3_1_syn1	39419	http://downloads.hmpdacc.orglocal/db/repository/ncbi/dacc_reference_genomes/20141006/39419/39419.ACUH01000001-ACUH01000065.cds.fsa	http://downloads.hmpdacc.orglocal/db/repository/ncbi/dacc_reference_genomes/20141006/39419/39419.JH414690-JH414697.cds.fsa
Tannerella sp. 6_1_58FAA_CT1	40043	http://downloads.hmpdacc.orglocal/db/repository/ncbi/dacc_reference_genomes/20141006/40043/40043.ACWX01000001-ACWX01000088.cds.fsa	http://downloads.hmpdacc.orglocal/db/repository/ncbi/dacc_reference_genomes/20141006/40043/40043.JH414766-JH414797.cds.fsa
Turicibacter sanguinis PC909	42765	http://downloads.hmpdacc.orglocal/db/repository/ncbi/dacc_reference_genomes/20141006/42765/42765.ADMN01000001-ADMN01000125.cds.fsa
Turicibacter sp. HGF1	59523	http://downloads.hmpdacc.orglocal/db/repository/ncbi/dacc_reference_genomes/20141006/59523/59523.AEXQ01000001-AEXQ01000142.cds.fsa
Tyzzerella nexilis DSM 1787	28659	http://downloads.hmpdacc.orglocal/db/repository/ncbi/dacc_reference_genomes/20141006/28659/28659.ABWO01000001-ABWO01000316.cds.fsa	http://downloads.hmpdacc.orglocal/db/repository/ncbi/dacc_reference_genomes/20141006/28659/28659.DS995337-DS995353.cds.fsa
Veillonella sp. 3_1_44	41975	http://downloads.hmpdacc.orglocal/db/repository/ncbi/dacc_reference_genomes/20141006/41975/41975.ADCV01000001-ADCV01000031.cds.fsa	http://downloads.hmpdacc.orglocal/db/repository/ncbi/dacc_reference_genomes/20141006/41975/41975.GG770199-GG770214.cds.fsa
Veillonella sp. 6_1_27	41977	http://downloads.hmpdacc.orglocal/db/repository/ncbi/dacc_reference_genomes/20141006/41977/41977.ADCW01000001-ADCW01000022.cds.fsa	http://downloads.hmpdacc.orglocal/db/repository/ncbi/dacc_reference_genomes/20141006/41977/41977.GG770215-GG770224.cds.fsa
Veillonella sp. HPA0037	169494	http://downloads.hmpdacc.orglocal/db/repository/ncbi/dacc_reference_genomes/20141006/169494/169494.ATCG01000001-ATCG01000025.cds.fsa	http://downloads.hmpdacc.orglocal/db/repository/ncbi/dacc_reference_genomes/20141006/169494/169494.KE150483-KE150485.cds.fsa
Weissella paramesenteroides ATCC 33313	34661	http://downloads.hmpdacc.orglocal/db/repository/ncbi/dacc_reference_genomes/20141006/34661/34661.ACKU01000001-ACKU01000036.cds.fsa	http://downloads.hmpdacc.orglocal/db/repository/ncbi/dacc_reference_genomes/20141006/34661/34661.GG697128-GG697140.cds.fsa
Yokenella regensburgei ATCC 43003	65133	http://downloads.hmpdacc.orglocal/db/repository/ncbi/dacc_reference_genomes/20141006/65133/65133.AGCL01000001-AGCL01000048.cds.fsa	http://downloads.hmpdacc.orglocal/db/repository/ncbi/dacc_reference_genomes/20141006/65133/65133.JH417859-JH417874.cds.fsa
